# Supplementary material for: Identification of miRNAs involved in fruit ripening by deep sequencing of Olea europaea L. transcriptome
Source: PubMed Central journal article supplement (PMC6705801; doi:10.1371/journal.pone.0221460), 2019-08-22
Supplement: pone.0221460.s001.pdf [file pone.0221460.s001.pdf]

1 **S1 Fig.**  
2

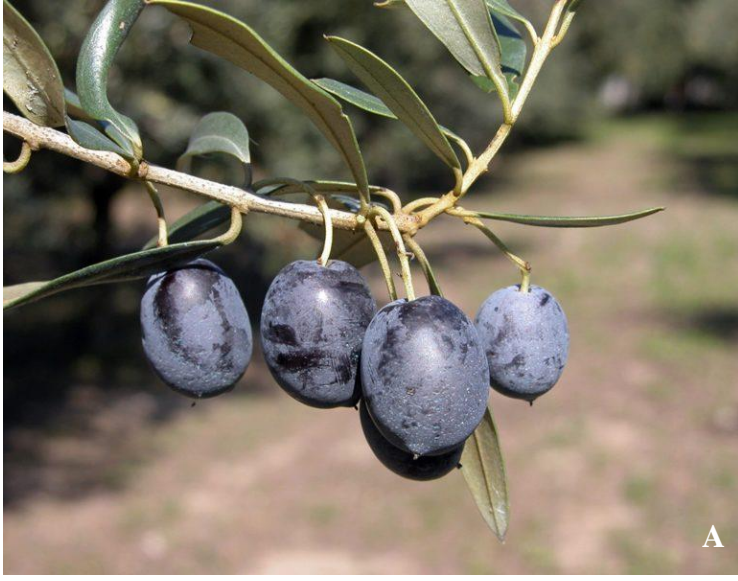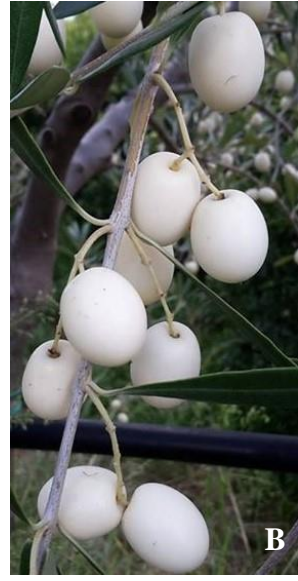

3
