# Supplementary material for: Identification of miRNAs involved in fruit ripening by deep sequencing of Olea europaea L. transcriptome
Source: PubMed Central journal article supplement (PMC6705801; doi:10.1371/journal.pone.0221460), 2019-08-22

# Analysis Pipeline

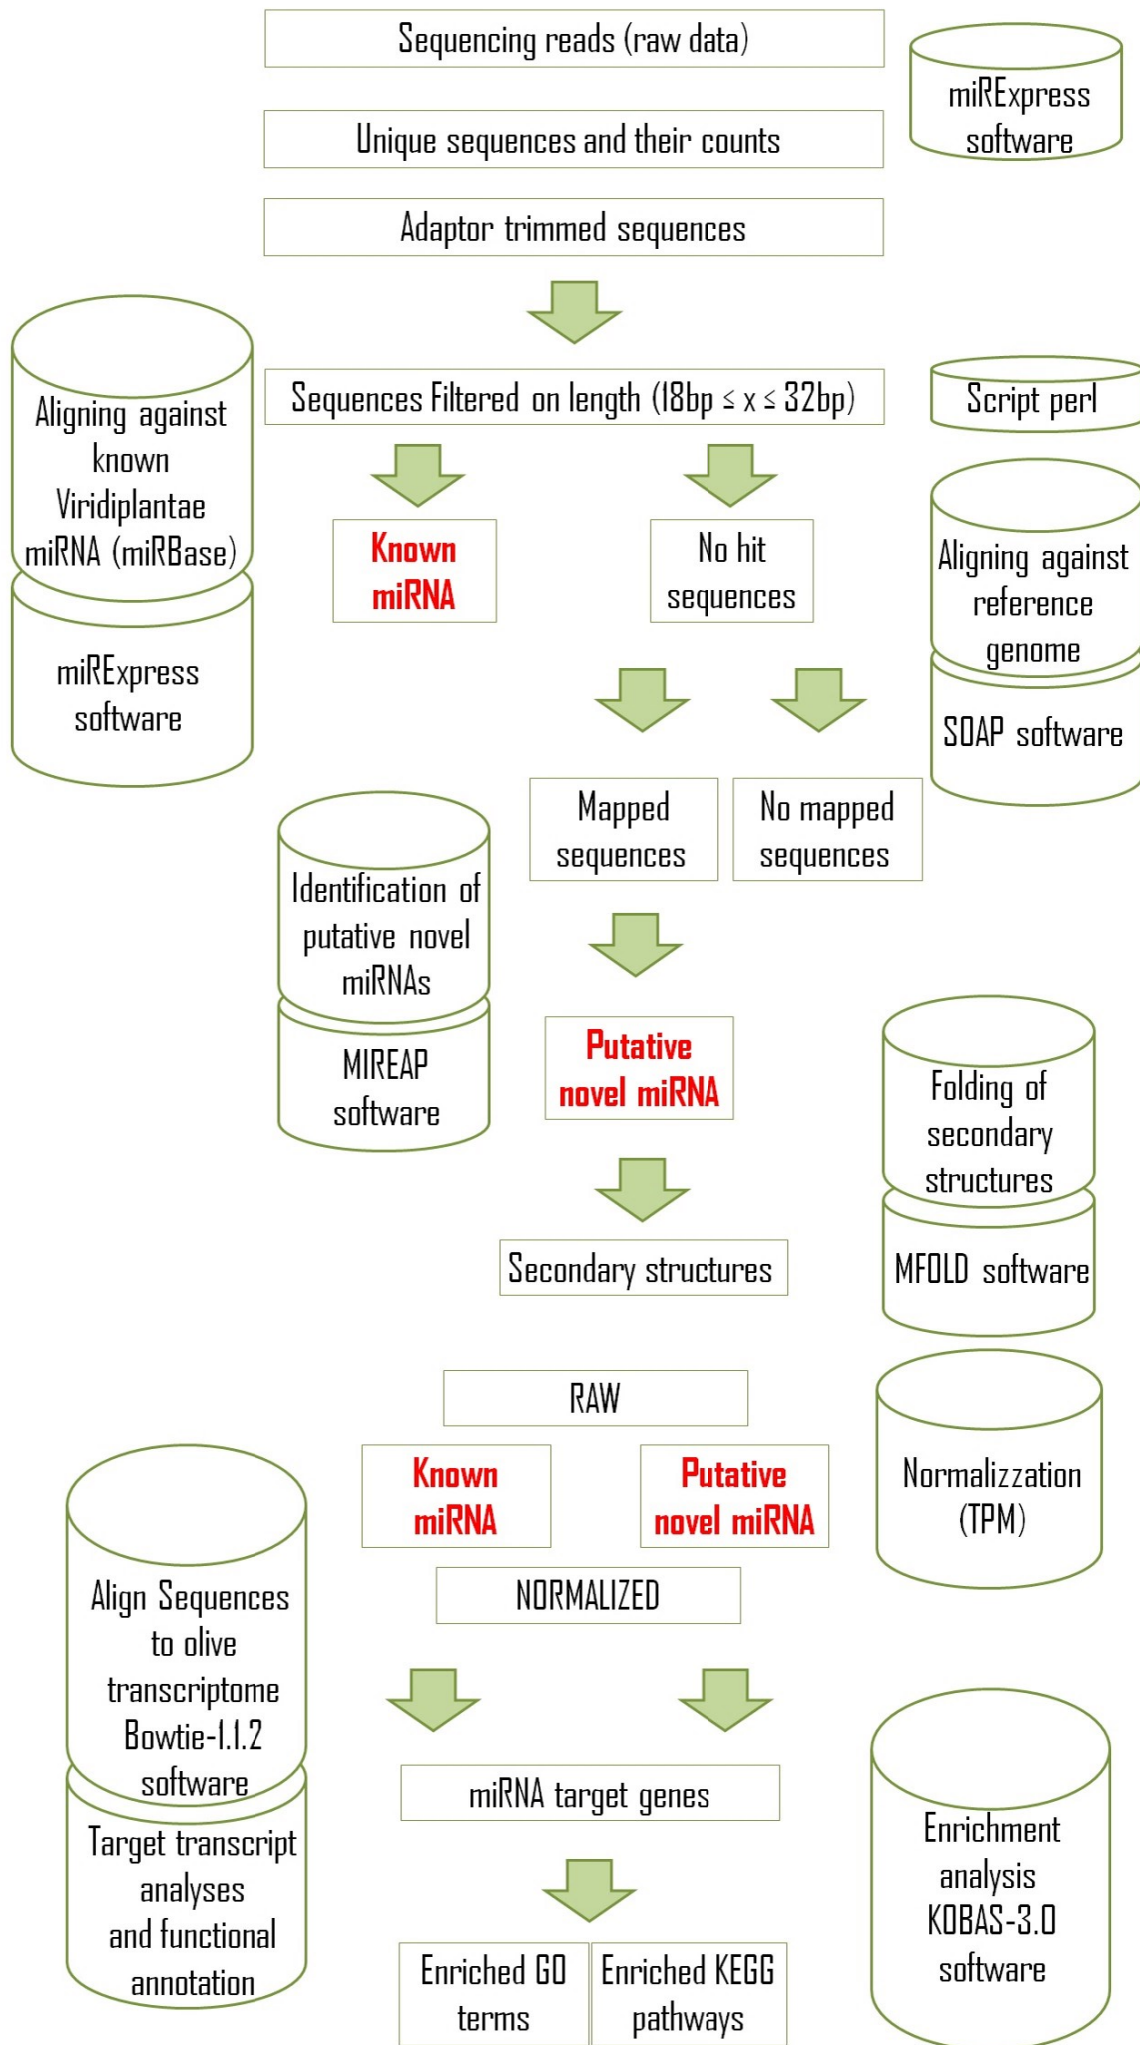

Supplement: pone.0221460.s002.pdf [file pone.0221460.s002.pdf]
