# Supplementary material for: Identification of miRNAs involved in fruit ripening by deep sequencing of Olea europaea L. transcriptome
Source: PubMed Central journal article supplement (PMC6705801; doi:10.1371/journal.pone.0221460), 2019-08-22
Supplement: pone.0221460.s003.pdf [file pone.0221460.s003.pdf]

## S1 Table

### A. Stem-loop qRT-PCR

| Oe-miRNAs primers | RT Primers (5'→3')                                      | Forward Primers(F) (5'→3')     | Universal Reverse Primer(R) (5'→3') |
|-------------------|---------------------------------------------------------|--------------------------------|-------------------------------------|
| Oe-miR159         | 5'-GTCGTATCCAGTGCAGGGTCCGAGGTATTGCGACTGG-3'             | 5'-GCGGCGGTATTGGAGTGAAGGGA-3'  | 5'-GTGCAGGGTCCGAGGT-3'              |
| Oe-miR166         |                                                         | 5'-GCGGCGGTCCGACCAGGCTTCAT-3'  |                                     |
| Oe-miR168         | 5'-GTCGTATCCAGTGCAGGGTCCGAGGTATTGCGACTGGATACGACATTAC-3' | 5'-TTCCTTGATCCCGCCTTGACACAA-3' |                                     |

From Yanik et al., 2013

### B. Quantitative Real-time PCR of Predicted Target Genes

| Sequences                   | Target primers |
|-----------------------------|----------------|
| 5'-CTATGATCGCATCCTCCG-3'    | comp60984_forw |
| 5'-CTATTGAGCATTAGCAGGTCG-3' | comp60984_rev  |
| 5'-CGCGCTATAGGTCAGTATCA-3'  | comp19510_rev  |
| 5'-GACAAAGTGGGAGTTGGATG-3'  | comp19510_forw |
| 5'-CCAATATCATCCAGTGAGC-3'   | comp97992_rev  |
| 5'-GAAGGTGATCTCGAGGTGTG-3'  | comp97992_forw |
