# Supplementary material for: Identification of miRNAs involved in fruit ripening by deep sequencing of Olea europaea L. transcriptome
Source: PubMed Central journal article supplement (PMC6705801; doi:10.1371/journal.pone.0221460), 2019-08-22
Supplement: pone.0221460.s004.pdf [file pone.0221460.s004.pdf]

## 1 S2 Table

| miRNA Name | raw data |       |      |      | normalized data |      |      |      |
|------------|----------|-------|------|------|-----------------|------|------|------|
|            | C100     | C130  | L100 | L130 | C100            | C130 | L100 | L130 |
| miR156     | 6        | 6     | 6    | 0    | 3               | 1    | 2    | 0    |
| miR156a    | 20       | 32    | 20   | 16   | 8               | 5    | 7    | 4    |
| miR156a-5p | 5        | 5     | 5    | 0    | 2               | 1    | 2    | 0    |
| miR156b    | 15       | 21    | 15   | 8    | 6               | 3    | 5    | 2    |
| miR156b-5p | 8        | 8     | 8    | 0    | 4               | 1    | 3    | 0    |
| miR156c    | 14       | 17    | 14   | 4    | 6               | 3    | 5    | 1    |
| miR156c-5p | 6        | 6     | 6    | 0    | 3               | 1    | 2    | 0    |
| miR156d    | 14       | 14    | 14   | 0    | 6               | 2    | 5    | 0    |
| miR156d-5p | 8        | 8     | 8    | 0    | 4               | 1    | 3    | 0    |
| miR156e    | 9        | 12    | 9    | 4    | 4               | 2    | 3    | 1    |
| miR156e-5p | 5        | 5     | 5    | 0    | 2               | 1    | 2    | 0    |
| miR156f    | 5        | 8     | 5    | 4    | 2               | 1    | 2    | 1    |
| miR156f-5p | 6        | 6     | 6    | 0    | 3               | 1    | 2    | 0    |
| miR156g    | 5        | 5     | 5    | 0    | 2               | 1    | 2    | 0    |
| miR156g-5p | 5        | 5     | 5    | 0    | 2               | 1    | 2    | 0    |
| miR156h    | 3        | 3     | 3    | 0    | 2               | 1    | 1    | 0    |
| miR156h-5p | 4        | 4     | 4    | 0    | 2               | 1    | 2    | 0    |
| miR156i    | 4        | 4     | 4    | 0    | 2               | 1    | 2    | 0    |
| miR156i-5p | 4        | 4     | 4    | 0    | 2               | 1    | 2    | 0    |
| miR156j    | 2        | 5     | 2    | 4    | 1               | 1    | 1    | 1    |
| miR156j-5p | 2        | 2     | 2    | 0    | 1               | 0    | 1    | 0    |
| miR156k    | 2        | 5     | 2    | 4    | 1               | 1    | 1    | 1    |
| miR156k-5p | 1        | 1     | 1    | 0    | 1               | 0    | 1    | 0    |
| miR156l    | 1        | 1     | 1    | 0    | 1               | 0    | 1    | 0    |
| miR156l-5p | 1        | 1     | 1    | 0    | 1               | 0    | 1    | 0    |
| miR156m    | 1        | 1     | 1    | 0    | 1               | 0    | 1    | 0    |
| miR156n    | 2        | 2     | 2    | 0    | 1               | 0    | 1    | 0    |
| miR156o    | 2        | 2     | 2    | 0    | 1               | 0    | 1    | 0    |
| miR156q    | 1        | 1     | 1    | 0    | 1               | 0    | 1    | 0    |
| miR156s    | 1        | 1     | 1    | 0    | 1               | 0    | 1    | 0    |
| miR156t    | 0        | 3     | 0    | 4    | 0               | 1    | 0    | 1    |
| miR156u    | 1        | 4     | 1    | 4    | 1               | 1    | 1    | 1    |
| miR156v    | 1        | 4     | 1    | 4    | 1               | 1    | 1    | 1    |
| miR156w    | 1        | 4     | 1    | 4    | 1               | 1    | 1    | 1    |
| miR156x    | 1        | 1     | 1    | 0    | 1               | 0    | 1    | 0    |
| miR156y    | 1        | 1     | 1    | 0    | 1               | 0    | 1    | 0    |
| miR159     | 77       | 697   | 324  | 152  | 31              | 97   | 105  | 39   |
| miR159a    | 120      | 1102  | 538  | 228  | 49              | 154  | 174  | 59   |
| miR159a-3p | 23       | 213   | 102  | 44   | 10              | 30   | 33   | 12   |
| miR159b    | 43       | 402   | 214  | 76   | 18              | 56   | 69   | 20   |
| miR159b-3p | 20       | 194   | 112  | 32   | 8               | 27   | 36   | 8    |
| miR159c    | 16       | 130   | 65   | 26   | 7               | 18   | 21   | 7    |
| miR159c-3p | 2        | 0     | 0    | 0    | 1               | 0    | 0    | 0    |
| miR159d    | 5        | 48    | 28   | 8    | 2               | 7    | 9    | 2    |
| miR159e-3p | 9        | 82    | 37   | 18   | 4               | 12   | 12   | 5    |
| miR159f    | 0        | 3     | 0    | 1    | 0               | 1    | 0    | 1    |
| miR159f-3p | 5        | 48    | 28   | 8    | 2               | 7    | 9    | 2    |
| miR159j-3p | 5        | 48    | 28   | 8    | 2               | 7    | 9    | 2    |
| miR159k-3p | 5        | 48    | 28   | 8    | 2               | 7    | 9    | 2    |
| miR166     | 438      | 1282  | 524  | 259  | 176             | 179  | 169  | 67   |
| miR166a    | 6170     | 17348 | 6944 | 3422 | 2480            | 2419 | 2236 | 877  |
| miR166a-3p | 1740     | 5043  | 2074 | 1009 | 700             | 703  | 668  | 259  |

|            |      |       |      |      |      |      |      |     |
|------------|------|-------|------|------|------|------|------|-----|
| miR166b    | 5289 | 15167 | 6139 | 3008 | 2126 | 2115 | 1977 | 771 |
| miR166b-3p | 1326 | 3911  | 1582 | 790  | 533  | 545  | 510  | 203 |
| miR166c    | 4382 | 12493 | 5052 | 2469 | 1762 | 1742 | 1627 | 633 |
| miR166c-3p | 1547 | 4401  | 1761 | 874  | 622  | 614  | 567  | 224 |
| miR166d    | 3737 | 10736 | 4359 | 2139 | 1502 | 1497 | 1404 | 549 |
| miR166d-3p | 1326 | 3906  | 1578 | 786  | 533  | 545  | 508  | 202 |
| miR166e    | 3275 | 9246  | 3739 | 1821 | 1317 | 1289 | 1204 | 467 |
| miR166e-3p | 1290 | 3691  | 1536 | 735  | 519  | 515  | 495  | 189 |
| miR166f    | 3093 | 8684  | 3443 | 1701 | 1244 | 1211 | 1109 | 436 |
| miR166f-3p | 213  | 605   | 255  | 119  | 86   | 85   | 82   | 31  |
| miR166g    | 1970 | 5731  | 2347 | 1147 | 792  | 799  | 756  | 294 |
| miR166g-3p | 904  | 2586  | 997  | 511  | 364  | 361  | 321  | 131 |
| miR166h    | 1757 | 5126  | 2092 | 1026 | 707  | 715  | 674  | 263 |
| miR166h-3p | 671  | 1846  | 719  | 354  | 270  | 258  | 232  | 91  |
| miR166i    | 1082 | 3088  | 1281 | 614  | 435  | 431  | 413  | 158 |
| miR166i-3p | 663  | 1953  | 789  | 393  | 267  | 272  | 254  | 101 |
| miR166j    | 883  | 2382  | 960  | 462  | 355  | 332  | 309  | 119 |
| miR166j-3p | 230  | 686   | 273  | 136  | 93   | 96   | 88   | 35  |
| miR166k    | 917  | 2477  | 927  | 474  | 369  | 346  | 299  | 122 |
| miR166l    | 222  | 610   | 256  | 121  | 90   | 85   | 83   | 31  |
| miR166l-3p | 241  | 634   | 208  | 118  | 97   | 89   | 67   | 31  |
| miR166m    | 239  | 696   | 277  | 140  | 96   | 97   | 89   | 36  |
| miR166m-3p | 228  | 555   | 191  | 99   | 92   | 78   | 62   | 26  |
| miR166n    | 240  | 764   | 291  | 159  | 97   | 107  | 94   | 41  |
| miR166o    | 240  | 764   | 291  | 159  | 97   | 107  | 94   | 41  |
| miR166p    | 213  | 600   | 251  | 117  | 86   | 84   | 81   | 30  |
| miR166q    | 240  | 764   | 291  | 159  | 97   | 107  | 94   | 41  |
| miR166r    | 6    | 11    | 4    | 0    | 3    | 2    | 2    | 0   |
| miR166s    | 225  | 677   | 269  | 138  | 91   | 95   | 87   | 36  |
| miR166t    | 225  | 677   | 269  | 138  | 91   | 95   | 87   | 36  |
| miR166u    | 225  | 676   | 269  | 138  | 91   | 94   | 87   | 36  |
| miR168     | 18   | 108   | 135  | 81   | 8    | 15   | 44   | 21  |
| miR168a    | 12   | 72    | 90   | 59   | 5    | 10   | 29   | 15  |
| miR168a-3p | 6    | 22    | 3    | 10   | 3    | 3    | 1    | 3   |
| miR168a-5p | 8    | 48    | 60   | 41   | 4    | 7    | 20   | 11  |
| miR168b    | 8    | 48    | 60   | 41   | 4    | 7    | 20   | 11  |
| miR168b-3p | 3    | 15    | 0    | 9    | 2    | 2    | 0    | 3   |
| miR168b-5p | 6    | 36    | 45   | 37   | 3    | 5    | 15   | 10  |
| miR168c    | 0    | 0     | 0    | 5    | 0    | 0    | 0    | 2   |
| miR168c-3p | 2    | 10    | 0    | 6    | 1    | 2    | 0    | 2   |
| miR168c-5p | 2    | 12    | 15   | 14   | 1    | 2    | 5    | 4   |
| miR168d    | 2    | 12    | 15   | 9    | 1    | 2    | 5    | 3   |
| miR168e    | 2    | 12    | 15   | 9    | 1    | 2    | 5    | 3   |
| miR172d    | 0    | 3     | 0    | 0    | 0    | 1    | 0    | 0   |
| miR3630-3p | 1    | 0     | 0    | 0    | 1    | 0    | 0    | 0   |
| miR390     | 0    | 28    | 0    | 12   | 0    | 4    | 0    | 3   |
| miR390-5p  | 0    | 14    | 0    | 6    | 0    | 2    | 0    | 2   |
| miR390a    | 0    | 52    | 0    | 22   | 0    | 7    | 0    | 6   |
| miR390a-5p | 0    | 30    | 0    | 12   | 0    | 4    | 0    | 3   |
| miR390b    | 0    | 56    | 0    | 24   | 0    | 8    | 0    | 6   |
| miR390b-5p | 0    | 28    | 0    | 10   | 0    | 4    | 0    | 3   |
| miR390c    | 0    | 34    | 0    | 14   | 0    | 5    | 0    | 4   |
| miR390d    | 0    | 16    | 0    | 6    | 0    | 2    | 0    | 2   |
| miR390d-5p | 0    | 4     | 0    | 2    | 0    | 1    | 0    | 1   |
| miR390e    | 0    | 10    | 0    | 4    | 0    | 2    | 0    | 1   |
| miR390f    | 0    | 10    | 0    | 4    | 0    | 2    | 0    | 1   |

|            |   |    |   |    |   |   |   |   |
|------------|---|----|---|----|---|---|---|---|
| miR390g    | 0 | 6  | 0 | 2  | 0 | 1 | 0 | 1 |
| miR396     | 0 | 0  | 0 | 6  | 0 | 0 | 0 | 2 |
| miR396-5p  | 0 | 0  | 0 | 6  | 0 | 0 | 0 | 2 |
| miR396a    | 0 | 0  | 0 | 4  | 0 | 0 | 0 | 1 |
| miR396a-3p | 0 | 0  | 0 | 1  | 0 | 0 | 0 | 1 |
| miR396a-5p | 0 | 0  | 0 | 4  | 0 | 0 | 0 | 1 |
| miR396b    | 0 | 0  | 0 | 18 | 0 | 0 | 0 | 5 |
| miR396b-5p | 0 | 0  | 0 | 6  | 0 | 0 | 0 | 2 |
| miR396c    | 0 | 0  | 0 | 19 | 0 | 0 | 0 | 5 |
| miR396c-5p | 0 | 0  | 0 | 4  | 0 | 0 | 0 | 1 |
| miR396d    | 0 | 0  | 0 | 8  | 0 | 0 | 0 | 2 |
| miR396e    | 0 | 0  | 0 | 10 | 0 | 0 | 0 | 3 |
| miR396e-5p | 0 | 0  | 0 | 6  | 0 | 0 | 0 | 2 |
| miR396f    | 0 | 0  | 0 | 2  | 0 | 0 | 0 | 1 |
| miR396f-5p | 0 | 0  | 0 | 2  | 0 | 0 | 0 | 1 |
| miR396k-5p | 0 | 0  | 0 | 2  | 0 | 0 | 0 | 1 |
| miR482c-3p | 2 | 0  | 0 | 0  | 1 | 0 | 0 | 0 |
| miR5083    | 0 | 0  | 0 | 1  | 0 | 0 | 0 | 1 |
| miR5538    | 0 | 0  | 0 | 2  | 0 | 0 | 0 | 1 |
| miR6300    | 1 | 3  | 0 | 1  | 1 | 1 | 0 | 1 |
| miR845c    | 1 | 0  | 0 | 0  | 1 | 0 | 0 | 0 |
| miR894     | 1 | 20 | 6 | 0  | 1 | 3 | 2 | 0 |

---
