# Supplementary material for: Identification of miRNAs involved in fruit ripening by deep sequencing of Olea europaea L. transcriptome
Source: PubMed Central journal article supplement (PMC6705801; doi:10.1371/journal.pone.0221460), 2019-08-22
Supplement: pone.0221460.s005.pdf [file pone.0221460.s005.pdf]

1 S3 Table

| Novel ID  | Location                   | Strand | Sequence of 3'                  | Sequence of 5'                | raw data |      |      |      | nomalized data |      |      |      |
|-----------|----------------------------|--------|---------------------------------|-------------------------------|----------|------|------|------|----------------|------|------|------|
|           |                            |        |                                 |                               | C100     | C130 | L100 | L130 | C100           | C130 | L100 | L130 |
| Oe_mir_1  | FKYM01055610.1_2875:2902   | -      |                                 | CAGATGCAATCTGCACCACCCAGGGTT   | 6        | 0    | 0    | 4    | 3              | 0    | 0    | 1    |
| Oe_mir_2  | FKYM01055214.1_1219:1247   | +      | GAGAGGGATGGGGTTTCTCTCGCTTTTGG   |                               | 14       | 0    | 0    | 0    | 6              | 0    | 0    | 0    |
| Oe_mir_3  | FKYM01054197.1_28858:28886 | +      |                                 | TTGGGCTCCGGGAGGGGAGATGTAAGAA  | 36       | 0    | 0    | 0    | 15             | 0    | 0    | 0    |
| Oe_mir_4  | FKYM01050891.1_28768:28796 | -      |                                 | TGTGCTGGGAGTCCCTAATGATTAATA   | 4        | 0    | 0    | 0    | 2              | 0    | 0    | 0    |
| Oe_mir_5  | FKYM01050338.1_34826:34853 | +      |                                 | GCTTTTGTACCGAGGGTTCGAATCCC    | 3        | 3    | 0    | 0    | 2              | 1    | 0    | 0    |
| Oe_mir_6  | FKYM01046616.1_5824:5851   | -      |                                 | TGATCTGCCGAAGCCGTGGGATGAAAAA  | 22       | 0    | 0    | 0    | 9              | 0    | 0    | 0    |
| Oe_mir_7  | FKYM01046010.1_24248:24276 | -      |                                 | CTTGAAGATTATAGAATGTTCTGAGGCC  | 5        | 0    | 0    | 0    | 2              | 0    | 0    | 0    |
| Oe_mir_8  | FKYM01044337.1_45579:45608 | +      | TTCTGATGATAAAAAGCGAATCTGAGCCTC  |                               | 93       | 86   | 0    | 15   | 38             | 12   | 0    | 4    |
| Oe_mir_9  | FKYM01043744.1_6792:6820   | -      | CAATGATCAGTAGCTGGTTCGAGAGGATG   |                               | 3        | 0    | 0    | 0    | 2              | 0    | 0    | 0    |
| Oe_mir_10 | FKYM01042526.1_21612:21641 | -      | CTGTAGCTCAGTTGGTAGAGCACCTCGAAA  |                               | 23       | 0    | 0    | 0    | 10             | 0    | 0    | 0    |
| Oe_mir_11 | FKYM01041785.1_40379:40407 | -      |                                 | AGTTTAGGTGAGGTATATTTCTGAGCCAG | 4        | 0    | 0    | 0    | 2              | 0    | 0    | 0    |
| Oe_mir_12 | FKYM01039660.1_42011:42040 | -      | AGTAGAGTTGAATAGCGGAAGATCCAATA   |                               | 3        | 0    | 0    | 0    | 2              | 0    | 0    | 0    |
| Oe_mir_13 | FKYM01038462.1_2970:2999   | +      | CCCTTAGATGTTCTGGGCCGACGCGCGCT   |                               | 5        | 0    | 0    | 0    | 2              | 0    | 0    | 0    |
| Oe_mir_14 | FKYM01036130.1_5095:5123   | +      | TATTTGTACAGATATGGTAGAGGGCACA    |                               | 27       | 0    | 0    | 0    | 11             | 0    | 0    | 0    |
| Oe_mir_15 | FKYM01035635.1_17875:17902 | +      | TTGGCATTGAGTTCATGGACCTGTACAG    |                               | 4        | 0    | 0    | 0    | 2              | 0    | 0    | 0    |
| Oe_mir_16 | FKYM01035436.1_18874:18877 | +      |                                 | GTGCCAAGTGGTAAGGCAACGGGTTTT   | 35       | 0    | 0    | 0    | 14             | 0    | 0    | 0    |
| Oe_mir_17 | FKYM01033727.1_28864:28894 | -      | CGTAGCCGCTCATGGTTATTTGGCCGATTA  |                               | 6        | 0    | 0    | 0    | 3              | 0    | 0    | 0    |
| Oe_mir_18 | FKYM01033545.1_10576:10604 | +      | ACCCCCATGTGAGAGCCCTGTACAGACC    |                               | 4        | 0    | 0    | 0    | 2              | 0    | 0    | 0    |
| Oe_mir_19 | FKYM01033405.1_36717:36744 | -      |                                 | GAGAGAAGAGCTGGAGCTGAAAATGAGT  | 3        | 3    | 0    | 0    | 2              | 1    | 0    | 0    |
| Oe_mir_20 | FKYM01031732.1_27775:27803 | -      |                                 | TAGACCTTGTTGTGTCAGAATTCTTAAT  | 3        | 0    | 0    | 0    | 2              | 0    | 0    | 0    |
| Oe_mir_21 | FKYM01031203.1_21800:21828 | +      | TCACTGGTCTAGCTCCATGGCACTAAAAA   |                               | 7        | 0    | 0    | 6    | 3              | 0    | 0    | 2    |
| Oe_mir_22 | FKYM01031021.1_16233:16261 | +      |                                 | GGACCAGACAGGCGCAGGTAGCTTGACCG | 5        | 0    | 0    | 0    | 2              | 0    | 0    | 0    |
| Oe_mir_23 | FKYM01030694.1_9539:9567   | -      | CGAGGGCTACTATAGTTGATATGTGGAGC   |                               | 7        | 26   | 0    | 0    | 3              | 4    | 0    | 0    |
| Oe_mir_24 | FKYM01030229.1_16611:16641 | -      | CCGCGCGATGTCGACGTGAAGAGGAATGCT  |                               | 51       | 0    | 0    | 0    | 21             | 0    | 0    | 0    |
| Oe_mir_25 | FKYM01029890.1_12726:12756 | -      | GATGTCGATCCTGAGCGGTTACCTGAGCAAC |                               | 23       | 0    | 0    | 15   | 10             | 0    | 0    | 4    |
| Oe_mir_26 | FKYM01025752.1_3968:3999   | +      | CTTGTGATTGAGAATCGTATCTGTGGCTACT |                               | 11       | 0    | 0    | 0    | 5              | 0    | 0    | 0    |
| Oe_mir_27 | FKYM01024763.1_626:656     | -      | GGGGATGCCGAAGGCAGGCTAGTACTGGA   |                               | 12       | 0    | 0    | 0    | 5              | 0    | 0    | 0    |
| Oe_mir_28 | FKYM01022360.1_5031:5060   | -      | CTTGGGCGAGAGTAGTACTAGGATGGGTGA  |                               | 78       | 0    | 0    | 0    | 32             | 0    | 0    | 0    |
| Oe_mir_29 | FKYM01022360.1_11953:11982 | -      | CCCCCTGGGAAGTCTCGTGTGCACCCCT    |                               | 19       | 150  | 0    | 0    | 8              | 21   | 0    | 0    |

|           |                            |   |                                   |                                  |     |     |    |    |    |    |    |    |
|-----------|----------------------------|---|-----------------------------------|----------------------------------|-----|-----|----|----|----|----|----|----|
| Oe_mir_30 | FKYM01022360.1_16605:16636 | - |                                   | TAGTACTAGGATGGGTGACCCCTGGGAAGTT  | 1   | 0   | 0  | 0  | 1  | 0  | 0  | 0  |
| Oe_mir_31 | FKYM01022360.1_16257:16286 | - | CCCCCTGGGAAGTCCTCGTGTGTACCCT      |                                  | 8   | 0   | 0  | 0  | 4  | 0  | 0  | 0  |
| Oe_mir_32 | FKYM01022358.1_15344:15372 | - |                                   | CCCCTGTGAAGTCCTCGTGTGCACCCCT     | 9   | 131 | 34 | 29 | 4  | 18 | 11 | 8  |
| Oe_mir_33 | FKYM01022358.1_20325:20353 | - |                                   | CCCCTGGGAAGTTCTCGTGTGCACCCCT     | 5   | 48  | 0  | 0  | 2  | 7  | 0  | 0  |
| Oe_mir_34 | FKYM01022358.1_31057:31084 | - | AGTAGTACTAGGATGGGTGACCCCTCTGG     |                                  | 3   | 0   | 0  | 4  | 2  | 0  | 0  | 1  |
| Oe_mir_35 | FKYM01020931.1_11846:11876 | + |                                   | AGCCATTCGGCGGTGAATTCGTTCCCGGGCC  | 5   | 0   | 0  | 0  | 2  | 0  | 0  | 0  |
| Oe_mir_36 | FKYM01014275.1_38979:39010 | + |                                   | ATTTGGTCTAGTGGTATGATTCTCGCTTTGGG | 4   | 0   | 0  | 0  | 2  | 0  | 0  | 0  |
| Oe_mir_37 | FKYM01014067.1_11568:11599 | + | AGGTGTAGCAATAATGAACGCTGGTGTATGTTG |                                  | 12  | 20  | 0  | 0  | 5  | 3  | 0  | 0  |
| Oe_mir_38 | FKYM01007076.1_17288:17316 | + | GTGAGGCTGGGCGACCTGATGAGGTGGCA     |                                  | 12  | 0   | 0  | 6  | 5  | 0  | 0  | 2  |
| Oe_mir_39 | FKYM01006094.1_22386:22416 | + | AGTGGTAAGAATCCACGTTGTGGCCGTGGA    |                                  | 24  | 0   | 0  | 0  | 10 | 0  | 0  | 0  |
| Oe_mir_40 | FKYM01002722.1_3841:3872   | + |                                   | GCCTCGTGACTCCGTTGTCTGAATACTGTAT  | 3   | 0   | 0  | 0  | 2  | 0  | 0  | 0  |
| Oe_mir_41 | FKYM01002369.1_752:781     | - | TTATTGTCTATCGTCGGCCCTATGGTAGA     |                                  | 18  | 0   | 0  | 0  | 8  | 0  | 0  | 0  |
| Oe_mir_42 | FKYM01000663.1_3464:3493   | - | TACTTCTCCTAGCTGCTTGGCCTGTAGTA     |                                  | 117 | 0   | 0  | 0  | 47 | 0  | 0  | 0  |
| Oe_mir_43 | FKYM01052587.1_72930:72958 | + |                                   | TGCATCGCGTGACAAATCTATTAAGCTTT    | 5   | 24  | 0  | 0  | 2  | 3  | 0  | 0  |
| Oe_mir_44 | FKYM01051081.1_21848:21875 | - | AGCGACATTATTGTGGAATGTAGACAC       |                                  | 12  | 0   | 0  | 0  | 5  | 0  | 0  | 0  |
| Oe_mir_45 | FKYM01046624.1_613:643     | - |                                   | CAGACCAAGAACTACGAGATCACCCCTTTCA  | 16  | 0   | 0  | 0  | 7  | 0  | 0  | 0  |
| Oe_mir_46 | FKYM01044697.1_17668:17695 | - | TCTGATTGTGTTCTTTTTTGGTGACAG       |                                  | 7   | 45  | 14 | 6  | 3  | 6  | 5  | 2  |
| Oe_mir_47 | FKYM01044337.1_45577:45608 | + | TCTTCTGATGATAAAAGGCGAATCTGAGCCTC  |                                  | 45  | 0   | 0  | 0  | 18 | 0  | 0  | 0  |
| Oe_mir_48 | FKYM01043238.1_8907:8935   | + | GTAGCTCATATGGTAGGTCGTTAGTTTTG     |                                  | 4   | 0   | 0  | 0  | 2  | 0  | 0  | 0  |
| Oe_mir_49 | FKYM01042526.1_21613:21641 | - | CTGTAGCTCAGTTGGTAGAGCACCTCGAA     |                                  | 38  | 62  | 64 | 44 | 16 | 9  | 21 | 12 |
| Oe_mir_50 | FKYM01040697.1_6755:6784   | - |                                   | ACTTCGACCAGCGAACTCGAACAGAATTCC   | 3   | 0   | 0  | 0  | 2  | 0  | 0  | 0  |
| Oe_mir_51 | FKYM01038316.1_13055:13084 | - | CTGGAGTTATAACATTTGAATTTCTCTGAC    |                                  | 3   | 0   | 0  | 0  | 2  | 0  | 0  | 0  |
| Oe_mir_52 | FKYM01036652.1_25672:25699 | + |                                   | CTTGGTGGTGAAATGGTAGACACGCGAG     | 6   | 0   | 0  | 18 | 3  | 0  | 0  | 5  |
| Oe_mir_53 | FKYM01027114.1_15577:15604 | - | AATACTGCTAGACAGGAACATAAGTATG      |                                  | 3   | 0   | 0  | 0  | 2  | 0  | 0  | 0  |
| Oe_mir_54 | FKYM01025620.1_64968:64996 | - |                                   | TGATATCGTTGTTGGGTTGCAGGAAG       | 3   | 0   | 4  | 0  | 2  | 0  | 2  | 0  |
| Oe_mir_55 | FKYM01024763.1_629:656     | - | GGGGATGCCGAAGGCAGGGCTAGTACT       |                                  | 5   | 0   | 0  | 0  | 2  | 0  | 0  | 0  |
| Oe_mir_56 | FKYM01024477.1_73148:73178 | - | CTGGATGATTTCCGACCAGGCTTCATTCCCC   |                                  | 3   | 0   | 0  | 0  | 2  | 0  | 0  | 0  |
| Oe_mir_57 | FKYM01022360.1_11952:11982 | - |                                   | CCCCCTGGGAAGTCCTCGTGTGCACCCCTT   | 66  | 0   | 0  | 0  | 27 | 0  | 0  | 0  |
| Oe_mir_58 | FKYM01022360.1_16257:16285 | - | CCCCTGGGAAGTCCTCGTGTGTACCCT       |                                  | 15  | 0   | 56 | 21 | 6  | 0  | 18 | 6  |
| Oe_mir_59 | FKYM01022360.1_21160:21189 | - |                                   | TGAGAGTAGTACTAGGATGGGTGACCCCT    | 83  | 0   | 0  | 0  | 34 | 0  | 0  | 0  |
| Oe_mir_60 | FKYM01022358.1_10676:10706 | - |                                   | CCCCTGGGAAGTCCTCGTGTGCCCCCTAT    | 6   | 0   | 0  | 0  | 3  | 0  | 0  | 0  |
| Oe_mir_61 | FKYM01018308.1_24988:25016 | + | TTCAGCAACGGATTTCTTGGCTCTCGCAT     |                                  | 3   | 0   | 0  | 0  | 2  | 0  | 0  | 0  |

|           |                            |   |                                 |                                 |     |     |     |    |     |    |    |    |
|-----------|----------------------------|---|---------------------------------|---------------------------------|-----|-----|-----|----|-----|----|----|----|
| Oe_mir_62 | FKYM01018276.1_6486:6513   | + |                                 | CCGAGTTGGCGGCTGAGTTGGATTCTAA    | 3   | 0   | 0   | 0  | 2   | 0  | 0  | 0  |
| Oe_mir_63 | FKYM01010170.1_31901:31928 | - | CAGTTATAATCCAATTTCTCTGATGGTT    |                                 | 18  | 0   | 40  | 0  | 8   | 0  | 13 | 0  |
| Oe_mir_64 | FKYM01002444.1_19730:19757 | + |                                 | GTTGTCTGGCTCGAGAACTCTTTTGT      | 1   | 0   | 0   | 0  | 1   | 0  | 0  | 0  |
| Oe_mir_65 | FKYM01002444.1_19792:19819 | + | GCGTTGTCGGACCAGGCTTCATCCCCC     |                                 | 171 | 421 | 185 | 95 | 69  | 59 | 60 | 25 |
| Oe_mir_66 | FKYM01001755.1_27381:27411 | + |                                 | GAATTGATGAGCCGATGCGGTCTGAGTCCA  | 3   | 0   | 0   | 0  | 2   | 0  | 0  | 0  |
| Oe_mir_67 | FKYM01001671.1_2100:2131   | + |                                 | GTGCAAAGGTTTCTCGGGCCGGACGGAGATT | 674 | 0   | 0   | 0  | 271 | 0  | 0  | 0  |
| Oe_mir_68 | FKYM01000663.1_3463:3493   | - | TACTTCTCCTAGCTGCTTGGCCTGTAGTAG  |                                 | 15  | 0   | 0   | 0  | 6   | 0  | 0  | 0  |
| Oe_mir_69 | FKYM01057934.1_3444:3472   | + |                                 | AGTGGTGTTCAGTGGCGGACGGGTGAG     | 11  | 0   | 0   | 0  | 5   | 0  | 0  | 0  |
| Oe_mir_70 | FKYM01045039.1_60625:60654 | - |                                 | CTACTTAACTCAGTGGTTAGAGTATTGCTT  | 4   | 0   | 6   | 0  | 2   | 0  | 2  | 0  |
| Oe_mir_71 | FKYM01043238.1_8907:8934   | + | GTAGCTCATATGGTAGGTCGTTAGTTTT    |                                 | 10  | 0   | 0   | 0  | 4   | 0  | 0  | 0  |
| Oe_mir_72 | FKYM01030230.1_110:140     | - | CGACGTCGCGAGAAGTCCACTGAACCTTATC |                                 | 158 | 0   | 0   | 0  | 64  | 0  | 0  | 0  |
| Oe_mir_73 | FKYM01022360.1_15591:15619 | - |                                 | CCCCTGGGAAGTCCCTGTGTTGACCCCT    | 3   | 0   | 0   | 0  | 2   | 0  | 0  | 0  |
| Oe_mir_74 | FKYM01020931.1_11849:11879 | + |                                 | CATTCGGCGGTGAATTCGTTCCGGGCCCTTG | 4   | 0   | 0   | 0  | 2   | 0  | 0  | 0  |
| Oe_mir_75 | FKYM01056150.1_3689:3717   | + | AAAGCTGGGTCATGGACGTCACAATGTTT   |                                 | 3   | 0   | 0   | 0  | 2   | 0  | 0  | 0  |
| Oe_mir_76 | FKYM01041963.1_1877:1905   | + |                                 | AATCAACCTAGTACGAGAGGAACCGTTG    | 1   | 0   | 0   | 0  | 1   | 0  | 0  | 0  |
| Oe_mir_77 | FKYM01041963.1_1918:1948   | + | GGTCATCGCGCTTGGTTGAAAAGCCAGTGGC |                                 | 3   | 0   | 0   | 0  | 2   | 0  | 0  | 0  |
| Oe_mir_78 | FKYM01041785.1_40380:40407 | - |                                 | AGTTTAGGTGAGGTATATTCTGAGCCA     | 3   | 18  | 0   | 5  | 2   | 3  | 0  | 2  |
| Oe_mir_79 | FKYM01030229.1_6373:6403   | - |                                 | CGGGACATGCTCGGGCTCGGCTCGTCGCTTG | 1   | 0   | 0   | 0  | 1   | 0  | 0  | 0  |
| Oe_mir_80 | FKYM01030229.1_5912:5941   | - | TGTGAACGACGTTCTTCTCACCCCGGACC   |                                 | 3   | 0   | 0   | 0  | 2   | 0  | 0  | 0  |
| Oe_mir_81 | FKYM01022358.1_16017:16045 | - | CCCCCTGGGAAGTCCCTCGTGTGACCCAC   |                                 | 3   | 0   | 0   | 0  | 2   | 0  | 0  | 0  |
| Oe_mir_82 | FKYM01022358.1_37524:37552 | - | CCCTGGGAAGTCCCTCGTGTGACCCCTT    |                                 | 37  | 0   | 0   | 0  | 15  | 0  | 0  | 0  |
| Oe_mir_83 | FKYM01011318.1_22461:22490 | - | CCTACATCGTATTGGACGTAGTGGGCGATT  |                                 | 3   | 0   | 0   | 0  | 2   | 0  | 0  | 0  |
| Oe_mir_84 | FKYM01010646.1_44282:44313 | - | TGTGAAGGCATCGGACCAGGCTTCATCTCT  |                                 | 4   | 0   | 0   | 0  | 2   | 0  | 0  | 0  |
| Oe_mir_85 | FKYM01000663.1_3464:3491   | - | CTTCTCTAGCTGCTTGGCCTGTAGTA      |                                 | 32  | 0   | 0   | 0  | 13  | 0  | 0  | 0  |
| Oe_mir_86 | FKYM01053456.1_604:634     | + |                                 | CTAGTACGAGAGGACCGGGAAGGACGCACCT | 4   | 0   | 0   | 0  | 2   | 0  | 0  | 0  |
| Oe_mir_87 | FKYM01045973.1_27091:27119 | - | ATGACTTGAGAGGTGTAGGATAAGTGGGA   |                                 | 4   | 0   | 0   | 0  | 2   | 0  | 0  | 0  |
| Oe_mir_88 | FKYM01039660.1_42012:42040 | - | AGTAGAGTTGAATAGCGGGAAGATCCAAT   |                                 | 4   | 0   | 0   | 0  | 2   | 0  | 0  | 0  |
| Oe_mir_89 | FKYM01030048.1_65397:65424 | - |                                 | CAAGACCGTCAATTTTGATACCGTTGG     | 17  | 0   | 0   | 0  | 7   | 0  | 0  | 0  |
| Oe_mir_90 | FKYM01022360.1_4010:4038   | - |                                 | CCCCTGGGATGTCTCGTGTGACCCCT      | 3   | 0   | 0   | 0  | 2   | 0  | 0  | 0  |
| Oe_mir_91 | FKYM01020701.1_5499:5526   | + |                                 | AAATGATGAGTTTGGCACCTCTGAGTA     | 3   | 10  | 4   | 12 | 2   | 2  | 2  | 3  |
| Oe_mir_92 | FKYM01010646.1_44284:44313 | - | TGTGAAGGCATCGGACCAGGCTTCATCTCT  |                                 | 6   | 0   | 0   | 0  | 3   | 0  | 0  | 0  |
| Oe_mir_93 | FKYM01002117.1_2497:2526   | + |                                 | GGTGAAGTGTTCGGATCGCGGCGACGTGGG  | 6   | 0   | 0   | 0  | 3   | 0  | 0  | 0  |

|            |                              |   |                                 |                                 |   |    |   |   |   |   |   |   |
|------------|------------------------------|---|---------------------------------|---------------------------------|---|----|---|---|---|---|---|---|
| Oe_mir_94  | FKYM01057936.1_3228:3256     | - |                                 | CTCCATCTTCTCTTTAATCCATTCTTCC    | 0 | 3  | 0 | 0 | 0 | 1 | 0 | 0 |
| Oe_mir_95  | FKYM01057852.1_1548:1577     | - |                                 | CCAGTGTTAACTCCAGGAATCGAACTCTCC  | 0 | 3  | 0 | 0 | 0 | 1 | 0 | 0 |
| Oe_mir_96  | FKYM01057359.1_22840:22867   | + |                                 | GGTGGAAATCGAGGTGGGGAGGTAATGG    | 0 | 3  | 0 | 0 | 0 | 1 | 0 | 0 |
| Oe_mir_97  | FKYM01057189.1_7878:7906     | - |                                 | CTCCTCGGGCAGCCGATCGTAAAGTATTA   | 0 | 3  | 0 | 0 | 0 | 1 | 0 | 0 |
| Oe_mir_98  | FKYM01057147.1_46232:46259   | + |                                 | TTTCAGAGCTTGGGGTCTTAGTTGGAG     | 0 | 3  | 0 | 0 | 0 | 1 | 0 | 0 |
| Oe_mir_99  | FKYM01057017.1_21057:21086   | + | TGATGTCAAAGATTGGGATGGAATTCCTG   |                                 | 0 | 3  | 0 | 0 | 0 | 1 | 0 | 0 |
| Oe_mir_100 | FKYM01056678.1_69919:69947   | + | GAGACCTCAGCCTACTAAGTATGCA       |                                 | 0 | 4  | 0 | 0 | 0 | 1 | 0 | 0 |
| Oe_mir_101 | FKYM01056600.1_2135:2164     | + | TGATTTGAAGATATGGCAGAGGAAAACGTT  |                                 | 0 | 7  | 0 | 0 | 0 | 1 | 0 | 0 |
| Oe_mir_102 | FKYM01056569.1_38446:38475   | - | AATTGTCGCTCCGATTCTTTTTTTTTTTT   |                                 | 0 | 3  | 0 | 0 | 0 | 1 | 0 | 0 |
| Oe_mir_103 | FKYM01056501.1_3277:3305     | - |                                 | CTTGACTGTGGTCCCTGTTGTGCTGTAAG   | 0 | 3  | 0 | 0 | 0 | 1 | 0 | 0 |
| Oe_mir_104 | FKYM01055520.1_16794:16823   | + | TAGTGTAGACAAGGTGCTTCGGCAGGACGG  |                                 | 0 | 4  | 0 | 0 | 0 | 1 | 0 | 0 |
| Oe_mir_105 | FKYM01055512.1_46275:46302   | - |                                 | TCTGGAGTTATAGTAAAGGTTACACCTG    | 0 | 3  | 0 | 0 | 0 | 1 | 0 | 0 |
| Oe_mir_106 | FKYM01055253.1_22607:22636   | + |                                 | CGGGTTCGAATCTTTGGTTGGCACTCCTT   | 0 | 4  | 0 | 0 | 0 | 1 | 0 | 0 |
| Oe_mir_107 | FKYM01054560.1_1592:1619     | - | CTCGTGACCAAAGGCCTCCGCGTTCACC    |                                 | 0 | 4  | 0 | 0 | 0 | 1 | 0 | 0 |
| Oe_mir_108 | FKYM01053416.1_1717:1746     | - |                                 | CATTGGTCTAGTGGTATGATTCGCTTT     | 0 | 17 | 0 | 0 | 0 | 3 | 0 | 0 |
| Oe_mir_109 | FKYM01053369.1_3095:3126     | - | CCTGCCACACCTCCACGCGCACTCTGGCCCT |                                 | 0 | 3  | 0 | 0 | 0 | 1 | 0 | 0 |
| Oe_mir_110 | FKYM01053337.1_30324:30354   | - | CCGGACATGGCCTGCACACGGTGCCAGAAT  |                                 | 0 | 3  | 0 | 0 | 0 | 1 | 0 | 0 |
| Oe_mir_111 | FKYM01053185.1_34631:34658   | - |                                 | CTTGGACCGTTGGATTGACCCGCTGATC    | 0 | 19 | 0 | 0 | 0 | 3 | 0 | 0 |
| Oe_mir_112 | FKYM01053020.1_54191:54219   | + |                                 | TTCAGGCCAAGCTCGTCGTCTTACGGCG    | 0 | 3  | 0 | 0 | 0 | 1 | 0 | 0 |
| Oe_mir_113 | FKYM01052486.1_51784:51811   | - |                                 | AGACCGGAATTTGAAGCAGAGATGGAGA    | 0 | 3  | 0 | 0 | 0 | 1 | 0 | 0 |
| Oe_mir_114 | FKYM01052372.1_12262:12292   | - |                                 | CTTGAGGATGGTCGCACGTTGGCGGATTATA | 0 | 3  | 0 | 0 | 0 | 1 | 0 | 0 |
| Oe_mir_115 | FKYM01051749.1_34702:34732   | - | CTACTCGACCCCTTCTCTGAATTTAACAGT  |                                 | 0 | 4  | 0 | 0 | 0 | 1 | 0 | 0 |
| Oe_mir_116 | FKYM01051150.1_96483:96510   | - |                                 | TTATACCTATGAATTCATTGGACCCAG     | 0 | 4  | 0 | 0 | 0 | 1 | 0 | 0 |
| Oe_mir_117 | FKYM01050899.1_46311:46340   | + |                                 | GCACACTGTGCGGCTCCATCGGCATGGCAA  | 0 | 5  | 0 | 0 | 0 | 1 | 0 | 0 |
| Oe_mir_118 | FKYM01050454.1_146736:146763 | - |                                 | CTTGGCGTGTAGCTGAAGCTCTTGAATA    | 0 | 3  | 0 | 3 | 0 | 1 | 0 | 1 |
| Oe_mir_119 | FKYM01050453.1_4823:4854     | + |                                 | TGGGCTGCAGAATGAAATGTTGGAGATTCGA | 0 | 6  | 0 | 0 | 0 | 1 | 0 | 0 |
| Oe_mir_120 | FKYM01050353.1_28610:28638   | + | ACAGTGGATTGTTGTACTIONACTGGCGAAT |                                 | 0 | 3  | 0 | 0 | 0 | 1 | 0 | 0 |
| Oe_mir_121 | FKYM01049968.1_32946:32974   | + |                                 | CAGGTGTGGTCATTGCAAAAAGCCTTGCTC  | 0 | 3  | 0 | 0 | 0 | 1 | 0 | 0 |
| Oe_mir_122 | FKYM01047776.1_5933:5961     | + | ATGTTATCTCACGTCTTGTGGCAGCCGC    |                                 | 0 | 3  | 0 | 0 | 0 | 1 | 0 | 0 |
| Oe_mir_123 | FKYM01047533.1_1444:1472     | - | CGACAAGGACTTAATGGAAGGAAAGTTGG   |                                 | 0 | 5  | 0 | 0 | 0 | 1 | 0 | 0 |
| Oe_mir_124 | FKYM01047078.1_645:673       | + |                                 | TTCTCAATCGACAAAAGTGAAGATAT      | 0 | 4  | 0 | 0 | 0 | 1 | 0 | 0 |
| Oe_mir_125 | FKYM01047065.1_42827:42857   | - | CTCAGATGGATGACACGGACATCGTGA AAA |                                 | 0 | 3  | 0 | 0 | 0 | 1 | 0 | 0 |

|            |                            |   |                                  |   |     |     |    |   |    |    |    |
|------------|----------------------------|---|----------------------------------|---|-----|-----|----|---|----|----|----|
| Oe_mir_126 | FKYM01046860.1_475:502     | + | ATGGGCTAATTCATAGATCTTTGGGCTT     | 0 | 6   | 0   | 0  | 0 | 1  | 0  | 0  |
| Oe_mir_127 | FKYM01046529.1_40911:40940 | - | TTTAACCTTGGCTGGTGTCTCGACCATGA    | 0 | 3   | 0   | 0  | 0 | 1  | 0  | 0  |
| Oe_mir_128 | FKYM01046256.1_65825:65854 | - | CCTAAAGAGTAACGGAGGTGTGCGATGGCA   | 0 | 5   | 0   | 0  | 0 | 1  | 0  | 0  |
| Oe_mir_129 | FKYM01046010.1_24247:24276 | - | CTTGAAGAGTTATAGAATGTTCTGAGGCCG   | 0 | 132 | 123 | 51 | 0 | 19 | 40 | 13 |
| Oe_mir_130 | FKYM01045508.1_19849:19877 | + | GTTCACACACTCGACACTTGGCCGCCCT     | 0 | 4   | 0   | 0  | 0 | 1  | 0  | 0  |
| Oe_mir_131 | FKYM01045431.1_52605:52632 | + | GCATCGTGTTTGTAGTGTCTTCCCCTC      | 0 | 3   | 0   | 0  | 0 | 1  | 0  | 0  |
| Oe_mir_132 | FKYM01045414.1_40636:40665 | - | AACATCCTCGGGCCATTGACTAGCTTAAAA   | 0 | 3   | 0   | 0  | 0 | 1  | 0  | 0  |
| Oe_mir_133 | FKYM01045316.1_9274:9303   | + | ACCGACTGCTTGAAATTCCTCCAGTGGCCT   | 0 | 3   | 0   | 0  | 0 | 1  | 0  | 0  |
| Oe_mir_134 | FKYM01045207.1_84621:84650 | + | GTTGACAATTAGACACATGAAGGGGGGCC    | 0 | 3   | 0   | 0  | 0 | 1  | 0  | 0  |
| Oe_mir_135 | FKYM01045043.1_35421:35449 | - | CAATTTGGCGTCTGGATATCTGAATTCTT    | 0 | 3   | 0   | 0  | 0 | 1  | 0  | 0  |
| Oe_mir_136 | FKYM01044424.1_68296:68327 | + | ACCAAAACTCTACCCTTCGGCCACCTTGGCTA | 0 | 4   | 0   | 0  | 0 | 1  | 0  | 0  |
| Oe_mir_137 | FKYM01043974.1_52593:52621 | - | CATGTGCTCTCCACCCTGGCTCCTGGGAG    | 0 | 3   | 0   | 0  | 0 | 1  | 0  | 0  |
| Oe_mir_138 | FKYM01043922.1_628:658     | + | TTGTGAATGACATCTGGGGTTCATCCCGCA   | 0 | 13  | 0   | 0  | 0 | 2  | 0  | 0  |
| Oe_mir_139 | FKYM01043922.1_1250:1279   | + | GGTGGAAATCGAGGTGGGGAGGTAATGGTG   | 0 | 3   | 0   | 0  | 0 | 1  | 0  | 0  |
| Oe_mir_140 | FKYM01043625.1_36768:36798 | - | CATCTGATGTTTCTGTACGCTGTTTAAGCCG  | 0 | 3   | 0   | 0  | 0 | 1  | 0  | 0  |
| Oe_mir_141 | FKYM01043549.1_30443:30470 | + | TGGAGAGTGCTGTTCGGGTAGCCGGACA     | 0 | 4   | 0   | 0  | 0 | 1  | 0  | 0  |
| Oe_mir_142 | FKYM01043441.1_63848:63875 | + | GGTTATGAAGTAGTAACACTTGACGAAG     | 0 | 3   | 0   | 0  | 0 | 1  | 0  | 0  |
| Oe_mir_143 | FKYM01043315.1_12502:12530 | + | AAAGTTGGTTTTGGTTTTCTTTGTTTAGT    | 0 | 3   | 0   | 0  | 0 | 1  | 0  | 0  |
| Oe_mir_144 | FKYM01043295.1_24797:24828 | - | CATTGACTAATTAGTGATCCCTGGGCTACC   | 0 | 3   | 4   | 0  | 0 | 1  | 2  | 0  |
| Oe_mir_145 | FKYM01043227.1_12498:12526 | + | TCGTTTCATTAACCTGTGCTTGAAAAAT     | 0 | 4   | 0   | 0  | 0 | 1  | 0  | 0  |
| Oe_mir_146 | FKYM01042830.1_16146:16175 | + | GCTTTATAGATCTCCATGATATAGTCGTTT   | 0 | 3   | 0   | 0  | 0 | 1  | 0  | 0  |
| Oe_mir_147 | FKYM01042502.1_67650:67677 | - | TTTGTGGTAGGGCATTCTTCAAGCGTT      | 0 | 4   | 0   | 0  | 0 | 1  | 0  | 0  |
| Oe_mir_148 | FKYM01042085.1_1948:1978   | + | AAGGAGAGAAGTCGATGGGTACCATGCTTTT  | 0 | 3   | 0   | 0  | 0 | 1  | 0  | 0  |
| Oe_mir_149 | FKYM01042061.1_7863:7891   | + | TGTCATCACCGAGCTGGGCCGTCGAGCGA    | 0 | 3   | 0   | 0  | 0 | 1  | 0  | 0  |
| Oe_mir_150 | FKYM01042027.1_9590:9619   | - | TCGAACCGAACCGACCGAACCGAACCCGAC   | 0 | 3   | 0   | 0  | 0 | 1  | 0  | 0  |
| Oe_mir_151 | FKYM01041892.1_581:608     | - | CGCCGATAAAGTATATATTTAAGGTAC      | 0 | 5   | 0   | 0  | 0 | 1  | 0  | 0  |
| Oe_mir_152 | FKYM01041563.1_61699:61729 | - | CCCTTGAAAATCCGAAGGATCGAGTACCCTC  | 0 | 5   | 0   | 0  | 0 | 1  | 0  | 0  |
| Oe_mir_153 | FKYM01041310.1_64778:64809 | + | AGAGTTTCTTAGAGCCACTGCCCTTGGCGT   | 0 | 3   | 0   | 0  | 0 | 1  | 0  | 0  |
| Oe_mir_154 | FKYM01041219.1_14158:14186 | - | CCAGGGCGGCCACCTCGAAATCTTCCGGT    | 0 | 3   | 0   | 0  | 0 | 1  | 0  | 0  |
| Oe_mir_155 | FKYM01041150.1_361:392     | - | CTTTGGTTTATTGACTCCACCACCTCTCTCA  | 0 | 13  | 0   | 0  | 0 | 2  | 0  | 0  |
| Oe_mir_156 | FKYM01041092.1_51841:51868 | + | ACGCCTACTCTTTCGTTCCGGGATTATGA    | 0 | 3   | 0   | 0  | 0 | 1  | 0  | 0  |
| Oe_mir_157 | FKYM01040974.1_60508:60538 | + | TTGGCTCGACTCGGAGATGAACTACACTTTT  | 0 | 3   | 0   | 0  | 0 | 1  | 0  | 0  |

|            |                              |   |                                  |                                 |   |      |   |   |   |     |   |   |
|------------|------------------------------|---|----------------------------------|---------------------------------|---|------|---|---|---|-----|---|---|
| Oe_mir_158 | FKYM01040944.1_21036:21067   | + |                                  | GGTCGTAGGTTCGAATCCTACTGGGGAGATT | 0 | 10   | 0 | 0 | 0 | 2   | 0 | 0 |
| Oe_mir_159 | FKYM01040758.1_3058:3085     | - | CCCGTGGTGAAGCAGATTTCTGGGCC       |                                 | 0 | 3    | 0 | 0 | 0 | 1   | 0 | 0 |
| Oe_mir_160 | FKYM01040472.1_43462:43492   | - |                                  | CTGAACTTTGCCGAAATTCCTAGAGAGGTC  | 0 | 12   | 0 | 0 | 0 | 2   | 0 | 0 |
| Oe_mir_161 | FKYM01039660.1_42762:42789   | - |                                  | CTCGTGACTCAATTGGAGAAGTATGATGCA  | 0 | 3    | 0 | 0 | 0 | 1   | 0 | 0 |
| Oe_mir_162 | FKYM01039644.1_34763:34794   | + |                                  | ATGTGCTCTCCACCCTGGCTCTGGGAGGCAC | 0 | 7    | 0 | 0 | 0 | 1   | 0 | 0 |
| Oe_mir_163 | FKYM01039644.1_33671:33700   | - |                                  | GAGTTGACACCTCGGATGACACTCTACACA  | 0 | 3    | 0 | 0 | 0 | 1   | 0 | 0 |
| Oe_mir_164 | FKYM01038462.1_1224:1254     | + | TGGTTGATCCTGCCAGTAGTCATATGCTTGT  |                                 | 0 | #### | 0 | 0 | 0 | 249 | 0 | 0 |
| Oe_mir_165 | FKYM01037829.1_36200:36228   | + |                                  | AGAAGAAAGATGCAGGATTTGATGGGCAA   | 0 | 3    | 0 | 0 | 0 | 1   | 0 | 0 |
| Oe_mir_166 | FKYM01037652.1_32745:32772   | + | GCCCTGCTGCTCGAGACGAAGAGCTCAA     |                                 | 0 | 3    | 0 | 0 | 0 | 1   | 0 | 0 |
| Oe_mir_167 | FKYM01037411.1_2451:2481     | + | AGACTATCTAGTTGTTGACGCGCTCCTTAT   |                                 | 0 | 4    | 0 | 0 | 0 | 1   | 0 | 0 |
| Oe_mir_168 | FKYM01037342.1_7411:7442     | + | AAAGGAGAGGAGGATGAGGACTTCAAAATTTT |                                 | 0 | 3    | 3 | 0 | 0 | 1   | 1 | 0 |
| Oe_mir_169 | FKYM01036609.1_19878:19908   | + |                                  | TTGCATAAACTCTCACATCTCCAAGGACTT  | 0 | 3    | 0 | 0 | 0 | 1   | 0 | 0 |
| Oe_mir_170 | FKYM01036575.1_61827:61855   | - | CCTCTTTGAAATGGGCTAGGGCTAAAACA    |                                 | 0 | 3    | 0 | 0 | 0 | 1   | 0 | 0 |
| Oe_mir_171 | FKYM01036452.1_35378:35406   | - | CTAATGAGAGCCACTGATGTGATGATTGC    |                                 | 0 | 4    | 0 | 0 | 0 | 1   | 0 | 0 |
| Oe_mir_172 | FKYM01036277.1_2975:3005     | - | CACCCCATGTGAGAGGCCCTGTACAGACCC   |                                 | 0 | 3    | 0 | 0 | 0 | 1   | 0 | 0 |
| Oe_mir_173 | FKYM01036130.1_1873:1901     | + | GACTTGGGATCATGTCTTCTTAGGACTAT    |                                 | 0 | 5    | 0 | 0 | 0 | 1   | 0 | 0 |
| Oe_mir_174 | FKYM01035677.1_10375:10403   | + |                                  | CTGTGATGAATTTTGAATCAGAAGATCA    | 0 | 7    | 0 | 0 | 0 | 1   | 0 | 0 |
| Oe_mir_175 | FKYM01035436.1_18874:188773  | + |                                  | GTGGCCAAGTGGAAGGCAACGGGTTTTGG   | 0 | 11   | 0 | 0 | 0 | 2   | 0 | 0 |
| Oe_mir_176 | FKYM01035104.1_61715:61743   | - | CACTGTACAATCGGACATTGAAATTTGCG    |                                 | 0 | 3    | 0 | 0 | 0 | 1   | 0 | 0 |
| Oe_mir_177 | FKYM01035061.1_32346:32376   | - |                                  | TTGTTGGTCTTCAACGAGGAATTCCTAGTAA | 0 | 14   | 0 | 0 | 0 | 2   | 0 | 0 |
| Oe_mir_178 | FKYM01035061.1_32122:32150   | - | TGGAAGGATCATTGTCGAAACCTACAAAA    |                                 | 0 | 4    | 0 | 0 | 0 | 1   | 0 | 0 |
| Oe_mir_179 | FKYM01035043.1_111590:111617 | + | AATGGGGTGCAGGAGGAATTGGTGAAT      |                                 | 0 | 3    | 0 | 0 | 0 | 1   | 0 | 0 |
| Oe_mir_180 | FKYM01034952.1_10057:10085   | + |                                  | GTTGTTTGTGGATCTGAAATTTTGAAT     | 0 | 4    | 0 | 0 | 0 | 1   | 0 | 0 |
| Oe_mir_181 | FKYM01034511.1_156768:156798 | - |                                  | CCCTTCGAGCAGGATATGCTATCTTTCGCTC | 0 | 8    | 0 | 5 | 0 | 1   | 0 | 2 |
| Oe_mir_182 | FKYM01034152.1_1289:1320     | + |                                  | CACCTTGGCTGCCGACCGACATACCACTTTG | 0 | 3    | 0 | 0 | 0 | 1   | 0 | 0 |
| Oe_mir_183 | FKYM01034081.1_29017:29045   | + | GAAGATTCTGTGACAACATCGTAGGATAC    |                                 | 0 | 3    | 0 | 0 | 0 | 1   | 0 | 0 |
| Oe_mir_184 | FKYM01033814.1_6356:6387     | + | TTTAGATCTGAACGGACTGGTAAATTTGGGCC |                                 | 0 | 3    | 0 | 0 | 0 | 1   | 0 | 0 |
| Oe_mir_185 | FKYM01033808.1_27257:27284   | - | TATGTTGTGGTGGCGTTAAGAATTCATT     |                                 | 0 | 4    | 0 | 0 | 0 | 1   | 0 | 0 |
| Oe_mir_186 | FKYM01033761.1_269336:269364 | + | ACCCAACTACTCCAATCAACCCGACTCG     |                                 | 0 | 3    | 0 | 0 | 0 | 1   | 0 | 0 |
| Oe_mir_187 | FKYM01033663.1_137754:137784 | - | ACCTTCGCCTTTTACCCTGGAGATGTGCC    |                                 | 0 | 3    | 0 | 0 | 0 | 1   | 0 | 0 |
| Oe_mir_188 | FKYM01033662.1_5592:5620     | + |                                  | TCGTGAGGACCGTATTGGTGTTCGAAGG    | 0 | 3    | 0 | 0 | 0 | 1   | 0 | 0 |
| Oe_mir_189 | FKYM01032959.1_25750:25777   | - | TATGATGATTTGTGATGGGAATCTCTC      |                                 | 0 | 9    | 0 | 0 | 0 | 1   | 0 | 0 |

|            |                              |   |                                   |                                  |   |   |   |   |   |   |   |   |
|------------|------------------------------|---|-----------------------------------|----------------------------------|---|---|---|---|---|---|---|---|
| Oe_mir_190 | FKYM01032593.1_39528:39558   | + |                                   | AGAATGTTTTGGCTGCTGTAACCTTGATTT   | 0 | 3 | 0 | 0 | 0 | 1 | 0 | 0 |
| Oe_mir_191 | FKYM01032455.1_173952:173983 | - |                                   | CTGACATTGATTCCACTGATTGTTGCTTCCAG | 0 | 9 | 0 | 0 | 0 | 1 | 0 | 0 |
| Oe_mir_192 | FKYM01032398.1_38958:38986   | - | CTTTGAGTCTTGGGAAACCTTAGTGGGG      |                                  | 0 | 3 | 0 | 0 | 0 | 1 | 0 | 0 |
| Oe_mir_193 | FKYM01032261.1_34412:34439   | + | GCTTGGGCTAAGATATATGGAACCTCGA      |                                  | 0 | 3 | 0 | 0 | 0 | 1 | 0 | 0 |
| Oe_mir_194 | FKYM01032181.1_16889:16920   | - | CTGAACTGCTGGCTGAGAAGAGATGTGTAGCT  |                                  | 0 | 3 | 0 | 0 | 0 | 1 | 0 | 0 |
| Oe_mir_195 | FKYM01032104.1_25851:25882   | + | ACTGGATCAAGGTCTGGATTATGTCGCCACAT  |                                  | 0 | 6 | 0 | 3 | 0 | 1 | 0 | 1 |
| Oe_mir_196 | FKYM01031956.1_33577:33607   | + |                                   | AAGATGGGTACACTCAAGATGGGACTGTAGA  | 0 | 3 | 0 | 0 | 0 | 1 | 0 | 0 |
| Oe_mir_197 | FKYM01031715.1_553:583       | - | CCCCTGTTGGGAGTACGTTTGCAAGAATGAA   |                                  | 0 | 3 | 0 | 0 | 0 | 1 | 0 | 0 |
| Oe_mir_198 | FKYM01031697.1_32005:32032   | - |                                   | CTGGCATACTTTGATCATGGAGGCATCC     | 0 | 4 | 0 | 0 | 0 | 1 | 0 | 0 |
| Oe_mir_199 | FKYM01031615.1_24175:24202   | + |                                   | CTTAACCTTTGAAAATTAGAGTTTGACTC    | 0 | 3 | 0 | 0 | 0 | 1 | 0 | 0 |
| Oe_mir_200 | FKYM01031548.1_41101:41128   | - | CTCTTCTCCCAAATCTCTCTGCGTGAA       |                                  | 0 | 3 | 0 | 0 | 0 | 1 | 0 | 0 |
| Oe_mir_201 | FKYM01031303.1_105321:105351 | + |                                   | AATCAGTACATGAACCCCGTCCTTAGAAA    | 0 | 3 | 0 | 0 | 0 | 1 | 0 | 0 |
| Oe_mir_202 | FKYM01030905.1_721:748       | + |                                   | GGCTCATACAGAACCGTTGAAGATATAT     | 0 | 4 | 0 | 0 | 0 | 1 | 0 | 0 |
| Oe_mir_203 | FKYM01030870.1_51900:51928   | + |                                   | CGTTGTTGGAGTTGGATCTCAGTGGCAAT    | 0 | 7 | 4 | 0 | 0 | 1 | 2 | 0 |
| Oe_mir_204 | FKYM01030824.1_348:375       | - | CGCCTCCGCTTATTCTGTATCGGTACAC      |                                  | 0 | 4 | 0 | 0 | 0 | 1 | 0 | 0 |
| Oe_mir_205 | FKYM01030424.1_7122:7152     | + | AGAAAAAGAAGAAGAAGAGAAAAAGAAAT     |                                  | 0 | 3 | 0 | 0 | 0 | 1 | 0 | 0 |
| Oe_mir_206 | FKYM01030327.1_64018:64047   | + | AGGGCAGAAGAGAATGATTGAACTTGGTAT    |                                  | 0 | 3 | 0 | 0 | 0 | 1 | 0 | 0 |
| Oe_mir_207 | FKYM01030115.1_2788:2817     | - |                                   | CTGCCATTGAGATAAGAGATCAAGATTGT    | 0 | 3 | 0 | 0 | 0 | 1 | 0 | 0 |
| Oe_mir_208 | FKYM01029967.1_18286:18315   | + |                                   | ATACCTTTTGTCCACTTCCAGTTCCTATG    | 0 | 5 | 0 | 0 | 0 | 1 | 0 | 0 |
| Oe_mir_209 | FKYM01028810.1_612:642       | - |                                   | CTAGGAAGAGCAGCATACTTGGAGGATTGGC  | 0 | 3 | 0 | 0 | 0 | 1 | 0 | 0 |
| Oe_mir_210 | FKYM01028100.1_2654:2684     | + | AAATCAAACAGGGCTTCTGTAGATTGGGCT    |                                  | 0 | 3 | 0 | 0 | 0 | 1 | 0 | 0 |
| Oe_mir_211 | FKYM01027885.1_29180:29209   | - | ACAATGGAATCAGTTTCTTAGGAAGGCCAC    |                                  | 0 | 7 | 0 | 0 | 0 | 1 | 0 | 0 |
| Oe_mir_212 | FKYM01027527.1_7775:7802     | + | AACGTTACTGTTATTATCATGAACAAAT      |                                  | 0 | 4 | 0 | 0 | 0 | 1 | 0 | 0 |
| Oe_mir_213 | FKYM01027278.1_291:318       | - | TGTTAAATCTATTTCCTGCACATTGGTT      |                                  | 0 | 3 | 0 | 0 | 0 | 1 | 0 | 0 |
| Oe_mir_214 | FKYM01026684.1_21524:21551   | - | GTAAGCCATGTCTTTCATTGAGGTGCGC      |                                  | 0 | 4 | 0 | 0 | 0 | 1 | 0 | 0 |
| Oe_mir_215 | FKYM01026603.1_7850:7877     | - |                                   | TGGATGTGAGAGATAAAAAATAAAGGGTT    | 0 | 3 | 0 | 0 | 0 | 1 | 0 | 0 |
| Oe_mir_216 | FKYM01026590.1_3110:3137     | + | CATTTACTGCTCTCATTGTACACTAATG      |                                  | 0 | 4 | 0 | 0 | 0 | 1 | 0 | 0 |
| Oe_mir_217 | FKYM01026399.1_2058:2089     | + | TAAGATTAGAGCGCATGTCTAAGTTGTTCCGGG |                                  | 0 | 5 | 0 | 0 | 0 | 1 | 0 | 0 |
| Oe_mir_218 | FKYM01026253.1_22880:22909   | + | GGTGTCCTGTTTCAGTCAAAGCCGGTCTGCA   |                                  | 0 | 3 | 0 | 0 | 0 | 1 | 0 | 0 |
| Oe_mir_219 | FKYM01026244.1_11719:11748   | + | AGTGGCAAGAAAAGGACAGTCGAGAAGAGA    |                                  | 0 | 3 | 0 | 0 | 0 | 1 | 0 | 0 |
| Oe_mir_220 | FKYM01026217.1_6151:6179     | + |                                   | TTGCAGTTCGTGGTGTGTTACTCATT       | 0 | 4 | 0 | 0 | 0 | 1 | 0 | 0 |
| Oe_mir_221 | FKYM01026167.1_1447:1475     | - | TATCGACACCTAAGATTGATGACCAGACC     |                                  | 0 | 3 | 0 | 0 | 0 | 1 | 0 | 0 |

|            |                              |   |                                 |                                  |   |     |   |   |   |     |   |   |
|------------|------------------------------|---|---------------------------------|----------------------------------|---|-----|---|---|---|-----|---|---|
| Oe_mir_222 | FKYM01025872.1_11227:11257   | + |                                 | TTGGTCATCTGGGCGTTTGTAGATCAAGAAT  | 0 | 4   | 0 | 0 | 0 | 1   | 0 | 0 |
| Oe_mir_223 | FKYM01025820.1_24211:24239   | - | CAGTATTAGACGCCCCAGAAACTGAAGGA   |                                  | 0 | 4   | 0 | 3 | 0 | 1   | 0 | 1 |
| Oe_mir_224 | FKYM01025779.1_287:315       | - |                                 | CGTTGGAATGCAAATGGTCGTCGAACCTT    | 0 | 3   | 0 | 0 | 0 | 1   | 0 | 0 |
| Oe_mir_225 | FKYM01025563.1_59213:59240   | + | CTTTGTCTTTGGGGCTTACAATTCACCT    |                                  | 0 | 14  | 0 | 0 | 0 | 2   | 0 | 0 |
| Oe_mir_226 | FKYM01025129.1_10921:10952   | - |                                 | GGGTATCTTGAAAGTCTCGGGTTCGAACCTTT | 0 | 3   | 0 | 0 | 0 | 1   | 0 | 0 |
| Oe_mir_227 | FKYM01025050.1_77572:77602   | + | CCTCTGGCTGTCGCGTGCTTGTGAACCCTTG |                                  | 0 | 4   | 0 | 0 | 0 | 1   | 0 | 0 |
| Oe_mir_228 | FKYM01024992.1_111314:111342 | + |                                 | GGTAGGCTTTAGTCATTGGCGCTCGAGTG    | 0 | 4   | 0 | 0 | 0 | 1   | 0 | 0 |
| Oe_mir_229 | FKYM01024767.1_64355:64384   | - |                                 | CACTCACCACCACCTTCCAATTCATTGCA    | 0 | 3   | 0 | 0 | 0 | 1   | 0 | 0 |
| Oe_mir_230 | FKYM01023731.1_32271:32298   | + | CATGGGCCAGGCTTGATGCGAACCGGCC    |                                  | 0 | 4   | 0 | 0 | 0 | 1   | 0 | 0 |
| Oe_mir_231 | FKYM01023446.1_7389:7418     | + |                                 | TTTGCAGGATGGGGAACAAATGAGAAATTG   | 0 | 3   | 0 | 0 | 0 | 1   | 0 | 0 |
| Oe_mir_232 | FKYM01023343.1_42295:42322   | - |                                 | GGGGCTGAAGGATCATGAAGACTTGATT     | 0 | 3   | 0 | 0 | 0 | 1   | 0 | 0 |
| Oe_mir_233 | FKYM01023310.1_82754:82781   | + |                                 | CTTTCATGGTGTAGTTCACATTGCTCCA     | 0 | 4   | 0 | 0 | 0 | 1   | 0 | 0 |
| Oe_mir_234 | FKYM01022965.1_14715:14742   | - | ATTATTACTGCTGCTACTACTACTTGAC    |                                  | 0 | 3   | 0 | 0 | 0 | 1   | 0 | 0 |
| Oe_mir_235 | FKYM01022919.1_11172:11200   | + |                                 | ATTGGCGGAGGCTGATGATAATGGGAGCA    | 0 | 3   | 0 | 0 | 0 | 1   | 0 | 0 |
| Oe_mir_236 | FKYM01022889.1_105454:105483 | - | GGAGAGACTGAGTGCTCAGTTATCATGTTT  |                                  | 0 | 4   | 5 | 0 | 0 | 1   | 2 | 0 |
| Oe_mir_237 | FKYM01022630.1_148806:148834 | - |                                 | CGAGTGGGGATTGGTACTGATGGTTTCAT    | 0 | 3   | 0 | 0 | 0 | 1   | 0 | 0 |
| Oe_mir_238 | FKYM01022360.1_18270:18298   | - | GCCCTGGGAAGTCCCTCGTGTGCACCCCT   |                                  | 0 | 149 | 0 | 0 | 0 | 21  | 0 | 0 |
| Oe_mir_239 | FKYM01022360.1_21839:21868   | - | GTAAAGCGTGCTTGGGCGAGAGTAGTACTA  |                                  | 0 | 6   | 0 | 0 | 0 | 1   | 0 | 0 |
| Oe_mir_240 | FKYM01022359.1_6030:6057     | - |                                 | CTTGGGCGAGAGTAGTACTAGGATGGAT     | 0 | 6   | 0 | 0 | 0 | 1   | 0 | 0 |
| Oe_mir_241 | FKYM01022358.1_21056:21086   | + |                                 | TAACTTCGGAGTTCTGATGGGATCCGAGGC   | 0 | 3   | 0 | 0 | 0 | 1   | 0 | 0 |
| Oe_mir_242 | FKYM01022358.1_10020:10047   | - | CCCCTGGGAAGTCCCTCGTGTGCACCCC    |                                  | 0 | ### | 0 | 0 | 0 | 406 | 0 | 0 |
| Oe_mir_243 | FKYM01022358.1_10678:10706   | - |                                 | CCCCTGGGAAGTCCCTCGTGTGCACCCCT    | 0 | 33  | 0 | 0 | 0 | 5   | 0 | 0 |
| Oe_mir_244 | FKYM01022358.1_22439:22467   | - |                                 | CCCGTGGGAAGTCCCTCGTGTGCACCCCT    | 0 | 17  | 0 | 0 | 0 | 3   | 0 | 0 |
| Oe_mir_245 | FKYM01022012.1_27180:27211   | + | GACTAGTCTTGTGGTGTATTGTCTTTG     |                                  | 0 | 3   | 0 | 0 | 0 | 1   | 0 | 0 |
| Oe_mir_246 | FKYM01021721.1_37399:37428   | + |                                 | TACTGAGACGCAGCACTGGAGATTTATGAT   | 0 | 4   | 0 | 0 | 0 | 1   | 0 | 0 |
| Oe_mir_247 | FKYM01021364.1_134468:134498 | + |                                 | CTCCATTCACAGACTTCCCTGTTTTGTACCAA | 0 | 3   | 0 | 0 | 0 | 1   | 0 | 0 |
| Oe_mir_248 | FKYM01021342.1_14557:14585   | - |                                 | CTTTGTCGTTGATTTTGTCTGTTGCAG      | 0 | 3   | 0 | 0 | 0 | 1   | 0 | 0 |
| Oe_mir_249 | FKYM01020992.1_55162:55190   | - |                                 | TAGGCTGGTTCGGATTGGTTATACATAGT    | 0 | 4   | 0 | 0 | 0 | 1   | 0 | 0 |
| Oe_mir_250 | FKYM01020931.1_11967:11998   | - |                                 | ATTGTACACCCCGGTCACACTATGGGAGC    | 0 | 15  | 0 | 0 | 0 | 2   | 0 | 0 |
| Oe_mir_251 | FKYM01020887.1_50338:50365   | - |                                 | TTCCCTTGCTTGTGATTGCAGTATCTGT     | 0 | 3   | 0 | 0 | 0 | 1   | 0 | 0 |
| Oe_mir_252 | FKYM01020836.1_54001:54029   | - |                                 | CTGGATTTAGAACAAAACAAGACAGCC      | 0 | 4   | 0 | 0 | 0 | 1   | 0 | 0 |
| Oe_mir_253 | FKYM01020806.1_47918:47946   | + |                                 | GCTACATTTTACATTTTCTTGTGGATA      | 0 | 5   | 0 | 0 | 0 | 1   | 0 | 0 |



|            |                              |   |                                  |   |    |   |    |   |    |   |   |
|------------|------------------------------|---|----------------------------------|---|----|---|----|---|----|---|---|
| Oe_mir_254 | FKYM01020739.1_18088:18118   | - | CTGGGTCATGAAATTGAGAATATTGTAGAGC  | 0 | 3  | 0 | 0  | 0 | 1  | 0 | 0 |
| Oe_mir_255 | FKYM01020737.1_19863:19892   | + | AACATCAGCTGCTGCTTCTCCCATGGGGGG   | 0 | 3  | 0 | 0  | 0 | 1  | 0 | 0 |
| Oe_mir_256 | FKYM01020655.1_53523:53550   | - | CAAGTGGAATTGTGTTGACAGTTGCTGT     | 0 | 7  | 3 | 0  | 0 | 1  | 1 | 0 |
| Oe_mir_257 | FKYM01020576.1_26883:26914   | - | CTGCCTGCCAATGTTGCTGATCTCCTGTAAGG | 0 | 4  | 0 | 0  | 0 | 1  | 0 | 0 |
| Oe_mir_258 | FKYM01020304.1_32011:32038   | - | CCTGGACCTGTTTGATAAECTTGATGTAG    | 0 | 3  | 0 | 0  | 0 | 1  | 0 | 0 |
| Oe_mir_259 | FKYM01020216.1_29780:29808   | - | CCAGTGGTCTAGTGGTAGAATAGTACCCT    | 0 | 74 | 0 | 0  | 0 | 10 | 0 | 0 |
| Oe_mir_260 | FKYM01020215.1_15652:15679   | - | CGTGGCCAAGTGGTAAGGCAACGGGTTT     | 0 | 72 | 0 | 15 | 0 | 10 | 0 | 4 |
| Oe_mir_261 | FKYM01019908.1_177537:177565 | - | CTGTCTGGATGGATATATGAATATAGCGA    | 0 | 3  | 0 | 0  | 0 | 1  | 0 | 0 |
| Oe_mir_262 | FKYM01019888.1_34696:34724   | + | TAGGCATCGATGGATGGGACTGATTGAA     | 0 | 5  | 0 | 0  | 0 | 1  | 0 | 0 |
| Oe_mir_263 | FKYM01018286.1_1424:1453     | - | CATTTGTGGAGAACAGAAGACTTGCTTATT   | 0 | 3  | 0 | 0  | 0 | 1  | 0 | 0 |
| Oe_mir_264 | FKYM01018039.1_6767:6795     | - | CTGTGAGTCGGGACTTGCTAAGGTCAATC    | 0 | 3  | 0 | 0  | 0 | 1  | 0 | 0 |
| Oe_mir_265 | FKYM01017651.1_96711:96738   | + | GAGAAGGAATTAGCTGCTGTTAAGATTA     | 0 | 3  | 0 | 0  | 0 | 1  | 0 | 0 |
| Oe_mir_266 | FKYM01017270.1_1650:1677     | + | CAACAGATCGTCGCATTTTAGTCCTCT      | 0 | 3  | 0 | 0  | 0 | 1  | 0 | 0 |
| Oe_mir_267 | FKYM01016520.1_1151:1179     | - | CAATTACCAGACTCTGAGAGCCCGGTATT    | 0 | 4  | 0 | 0  | 0 | 1  | 0 | 0 |
| Oe_mir_268 | FKYM01016251.1_16190:16220   | + | AGGGAATAAGAGCTGTCTGTACACTGCGCCT  | 0 | 3  | 0 | 0  | 0 | 1  | 0 | 0 |
| Oe_mir_269 | FKYM01016140.1_893:921       | - | ATGAGAGAGAAAAATGAAATGTAATAAAA    | 0 | 3  | 0 | 0  | 0 | 1  | 0 | 0 |
| Oe_mir_270 | FKYM01016107.1_50797:50825   | - | AGGGTATGCAAAATGAACACTCGGCGCCC    | 0 | 3  | 0 | 0  | 0 | 1  | 0 | 0 |
| Oe_mir_271 | FKYM01015889.1_3257:3286     | - | CAGGTTGTTGGAGGCAGCAGATGAGAGGAT   | 0 | 3  | 0 | 0  | 0 | 1  | 0 | 0 |
| Oe_mir_272 | FKYM01015691.1_7881:7909     | + | TAGTGTGGACGTTGGAGATTAGTAAGTC     | 0 | 6  | 0 | 0  | 0 | 1  | 0 | 0 |
| Oe_mir_273 | FKYM01015362.1_13420:13447   | - | TTTTGTCTCTGATGTCTTTTGATGCAG      | 0 | 3  | 0 | 0  | 0 | 1  | 0 | 0 |
| Oe_mir_274 | FKYM01015154.1_43247:43275   | - | TCTGTACCGATTGAACTTTGCTACTTGTA    | 0 | 4  | 0 | 0  | 0 | 1  | 0 | 0 |
| Oe_mir_275 | FKYM01014890.1_29876:29905   | - | GGTGAAGCGGAGGAAGTTGGACTAAGGAG    | 0 | 4  | 0 | 0  | 0 | 1  | 0 | 0 |
| Oe_mir_276 | FKYM01014814.1_23059:23086   | + | TCTGAACTGAGAACACAGGCAGATTAT      | 0 | 3  | 0 | 0  | 0 | 1  | 0 | 0 |
| Oe_mir_277 | FKYM01014745.1_573:601       | + | TCTCTAGACTGTGTCGGAATTGGCTGAAA    | 0 | 3  | 0 | 0  | 0 | 1  | 0 | 0 |
| Oe_mir_278 | FKYM01014521.1_2636:2664     | + | GTATTGATGTGTAGCTTGGAGGAGTTGTA    | 0 | 4  | 0 | 0  | 0 | 1  | 0 | 0 |
| Oe_mir_279 | FKYM01014450.1_36446:36473   | + | CTCCATACTGACGAACCATCTGTTGATG     | 0 | 3  | 0 | 0  | 0 | 1  | 0 | 0 |
| Oe_mir_280 | FKYM01014275.1_38979:39006   | + | ATTTGGTCTAGTGGTATGATTCTCGCTT     | 0 | 61 | 0 | 0  | 0 | 9  | 0 | 0 |
| Oe_mir_281 | FKYM01014275.1_39321:39349   | - | CATTTGGTCTAGTGGTATGATTCTCGCTT    | 0 | 13 | 0 | 0  | 0 | 2  | 0 | 0 |
| Oe_mir_282 | FKYM01014226.1_36524:36552   | + | TGATGGAAGTGGCGAAGGACGGTGACGGT    | 0 | 3  | 0 | 0  | 0 | 1  | 0 | 0 |
| Oe_mir_283 | FKYM01014067.1_11352:11380   | + | ACCAGCGTTCGATTGCTTCACATGTCTC     | 0 | 6  | 0 | 0  | 0 | 1  | 0 | 0 |
| Oe_mir_284 | FKYM01014066.1_42739:42770   | + | ATTTTTCTATCCAACCCACAACCTATAAGTA  | 0 | 3  | 0 | 0  | 0 | 1  | 0 | 0 |
| Oe_mir_285 | FKYM01013831.1_112003:112031 | + | GGATTGAGCGAGGGGAGAGGACGATAAT     | 0 | 3  | 0 | 0  | 0 | 1  | 0 | 0 |

|            |                            |   |                                  |                                   |   |    |    |   |   |   |   |   |
|------------|----------------------------|---|----------------------------------|-----------------------------------|---|----|----|---|---|---|---|---|
| Oe_mir_286 | FKYM01013681.1_43255:43283 | + | AGAAGCTCTGACCCTAATAATCCGCAAAG    |                                   | 0 | 3  | 0  | 0 | 0 | 1 | 0 | 0 |
| Oe_mir_287 | FKYM01013460.1_48785:48813 | + | GTGGTTGAAAACACTGAGAGGGGATGGCG    |                                   | 0 | 3  | 0  | 0 | 0 | 1 | 0 | 0 |
| Oe_mir_288 | FKYM01012939.1_24989:25019 | + | TGGACCAAAGAGGTGGACTATAACCGCAGAGA |                                   | 0 | 3  | 0  | 0 | 0 | 1 | 0 | 0 |
| Oe_mir_289 | FKYM01012927.1_2686:2717   | - | CTGAGATTGTCGTTGGCCTTATTGATCACCTA |                                   | 0 | 3  | 0  | 0 | 0 | 1 | 0 | 0 |
| Oe_mir_290 | FKYM01012386.1_11060:11089 | - |                                  | CAGAGCAGATTCACGTACAGGTTCAAATC     | 0 | 3  | 0  | 0 | 0 | 1 | 0 | 0 |
| Oe_mir_291 | FKYM01012275.1_39013:39041 | + | TCTAGTTCGCAAAGGCCTGGAAAGAAGCTG   |                                   | 0 | 3  | 0  | 0 | 0 | 1 | 0 | 0 |
| Oe_mir_292 | FKYM01012177.1_74001:74029 | + | TGGAACGCCGTCGCGCTCTGGGCTTGGGG    |                                   | 0 | 5  | 0  | 0 | 0 | 1 | 0 | 0 |
| Oe_mir_293 | FKYM01011956.1_31804:31832 | + | GTGGAGGATTAGATCCAGTAACTGGGGGT    |                                   | 0 | 3  | 0  | 0 | 0 | 1 | 0 | 0 |
| Oe_mir_294 | FKYM01011839.1_22220:22247 | + | GAGACCGAGAAGTTGCTTTAGCTGACTC     |                                   | 0 | 3  | 0  | 0 | 0 | 1 | 0 | 0 |
| Oe_mir_295 | FKYM01011479.1_96921:96952 | - | CATGTGATGATTTGCTGGATATCTAGATGGCT |                                   | 0 | 10 | 4  | 0 | 0 | 2 | 2 | 0 |
| Oe_mir_296 | FKYM01011318.1_22461:22489 | - | CTACATCGTATTGGACGTAGTGGGCGATT    |                                   | 0 | 20 | 0  | 0 | 0 | 3 | 0 | 0 |
| Oe_mir_297 | FKYM01011217.1_3441:3472   | + |                                  | TTTTATGCTTGATGAGATTGTTGATGGAGGG   | 0 | 6  | 0  | 0 | 0 | 1 | 0 | 0 |
| Oe_mir_298 | FKYM01010646.1_44324:44355 | - |                                  | GGCTGGCTCGAAGCAATCACAGTTTGTCTGTTA | 0 | 9  | 0  | 2 | 0 | 1 | 0 | 1 |
| Oe_mir_299 | FKYM01010646.1_44283:44313 | - | TGTGAAGGCATCGGACCAGGCTTCATTCTC   |                                   | 0 | 6  | 0  | 3 | 0 | 1 | 0 | 1 |
| Oe_mir_300 | FKYM01010420.1_5154:5184   | - | CAGGAGATGATGACACTGGCGCGGAAGAGA   |                                   | 0 | 4  | 0  | 0 | 0 | 1 | 0 | 0 |
| Oe_mir_301 | FKYM01010102.1_550:579     | - | CTTGTTTCTGATGATGACGAAACACATATG   |                                   | 0 | 11 | 0  | 0 | 0 | 2 | 0 | 0 |
| Oe_mir_302 | FKYM01010006.1_13689:13718 | - |                                  | CATTGGGCTAGAATACTTGTGAGGGATTG     | 0 | 4  | 0  | 0 | 0 | 1 | 0 | 0 |
| Oe_mir_303 | FKYM01009893.1_35512:35542 | - |                                  | CAACGCGGGCAAATCGGAATCTACTTGCCA    | 0 | 3  | 0  | 0 | 0 | 1 | 0 | 0 |
| Oe_mir_304 | FKYM01009841.1_22720:22750 | - |                                  | CTACTGCTTCTAATCCATTGAAGTCAGATG    | 0 | 3  | 0  | 0 | 0 | 1 | 0 | 0 |
| Oe_mir_305 | FKYM01009823.1_3172:3201   | + |                                  | ATGCCTATGAAATGTGGACCGATAAACCA     | 0 | 5  | 0  | 0 | 0 | 1 | 0 | 0 |
| Oe_mir_306 | FKYM01008166.1_3621:3651   | - |                                  | TTTTGGGTTACCCGACCCACCCTCCTCTC     | 0 | 5  | 0  | 0 | 0 | 1 | 0 | 0 |
| Oe_mir_307 | FKYM01007534.1_28559:28588 | - | TTTTCATTTCACTTTTCTTATCGTTCACA    |                                   | 0 | 3  | 0  | 0 | 0 | 1 | 0 | 0 |
| Oe_mir_308 | FKYM01007076.1_17287:17316 | + | GGTGAGGCTGGGCGACCTGATGAGGTGGCA   |                                   | 0 | 35 | 15 | 0 | 0 | 5 | 5 | 0 |
| Oe_mir_309 | FKYM01006718.1_20647:20676 | - | CTCTTGCGGAATGTTTGTAGATTCTGGAT    |                                   | 0 | 3  | 0  | 0 | 0 | 1 | 0 | 0 |
| Oe_mir_310 | FKYM01006580.1_94466:94497 | - |                                  | CTTAAGAAAGCAATTCGGCTCCGGCGATAAC   | 0 | 3  | 0  | 0 | 0 | 1 | 0 | 0 |
| Oe_mir_311 | FKYM01006545.1_48432:48460 | + | CTTCAGGACTGTGAGAAGTGTGATGAGT     |                                   | 0 | 6  | 0  | 0 | 0 | 1 | 0 | 0 |
| Oe_mir_312 | FKYM01006022.1_8662:8693   | + |                                  | GTCGCGAAGCCCGATTTCAGATTCTGGCCG    | 0 | 3  | 0  | 0 | 0 | 1 | 0 | 0 |
| Oe_mir_313 | FKYM01005955.1_4763:4791   | + |                                  | GGGGTGAACGGCCGTAAGTTCCTGGTCCC     | 0 | 3  | 0  | 0 | 0 | 1 | 0 | 0 |
| Oe_mir_314 | FKYM01005945.1_5994:6021   | + | GTCAATCGAAGCCTCAGTGTCCAGAT       |                                   | 0 | 3  | 0  | 0 | 0 | 1 | 0 | 0 |
| Oe_mir_315 | FKYM01005943.1_45544:45572 | - |                                  | CCAGTTCCTCCGAGGCCTCCTCATGTACT     | 0 | 3  | 0  | 0 | 0 | 1 | 0 | 0 |
| Oe_mir_316 | FKYM01005859.1_33696:33725 | + |                                  | CGTCTTGATTGGAAGCACATGTCTACACTT    | 0 | 5  | 0  | 0 | 0 | 1 | 0 | 0 |
| Oe_mir_317 | FKYM01005528.1_1435:1463   | + |                                  | CGCTGCGGATAAGGACAAGGCACCAAAT      | 0 | 3  | 0  | 0 | 0 | 1 | 0 | 0 |

|            |                              |   |                                  |   |    |   |   |   |   |   |   |
|------------|------------------------------|---|----------------------------------|---|----|---|---|---|---|---|---|
| Oe_mir_318 | FKYM01005233.1_459:487       | + | TTCAGTCGCCTCCAGTAAATCAATGGGAA    | 0 | 3  | 0 | 0 | 0 | 1 | 0 | 0 |
| Oe_mir_319 | FKYM01005150.1_42797:42825   | - | CTGTCAGGGTTGGCTTACTTGCACAGCAA    | 0 | 3  | 0 | 0 | 0 | 1 | 0 | 0 |
| Oe_mir_320 | FKYM01004445.1_30721:30748   | + | TTATGATCTTGAAGGCAAGACCGTTGGA     | 0 | 4  | 0 | 0 | 0 | 1 | 0 | 0 |
| Oe_mir_321 | FKYM01004346.1_45994:46022   | - | CTCCATACTGCAAAGGGCTGCTGAGAAGA    | 0 | 3  | 0 | 0 | 0 | 1 | 0 | 0 |
| Oe_mir_322 | FKYM01004241.1_35582:35609   | - | CAGAAGTTTTACGTGGAATGCAAAAAGA     | 0 | 6  | 0 | 0 | 0 | 1 | 0 | 0 |
| Oe_mir_323 | FKYM01004020.1_12618:12647   | + | TGTGATAATGGAAGTGAATGGTGAAGGTT    | 0 | 4  | 0 | 0 | 0 | 1 | 0 | 0 |
| Oe_mir_324 | FKYM01003810.1_57390:57417   | + | CGCTGAGATTCAGCCCTTTGTCGCTCA      | 0 | 4  | 0 | 4 | 0 | 1 | 0 | 1 |
| Oe_mir_325 | FKYM01003810.1_125141:125169 | + | ATAGTGTACATGTAGCAAGGTCCCAACCG    | 0 | 4  | 0 | 0 | 0 | 1 | 0 | 0 |
| Oe_mir_326 | FKYM01003456.1_62278:62305   | - | AACAGTAGTAATGAACAGTAACAGAAGA     | 0 | 3  | 0 | 0 | 0 | 1 | 0 | 0 |
| Oe_mir_327 | FKYM01003264.1_942:972       | + | TTTGCAATGTTTGACGGATTGAGGGCCCAA   | 0 | 6  | 0 | 0 | 0 | 1 | 0 | 0 |
| Oe_mir_328 | FKYM01003182.1_22696:22723   | - | CAGTGGCAACGGAATCTAATGGATCCTT     | 0 | 4  | 0 | 0 | 0 | 1 | 0 | 0 |
| Oe_mir_329 | FKYM01002918.1_16521:16552   | - | TATACCCAGAGAGAGAGAGAGAGAGAGGGA   | 0 | 3  | 0 | 0 | 0 | 1 | 0 | 0 |
| Oe_mir_330 | FKYM01002789.1_15586:15616   | + | CCATTGCCTGGTCCGAGCCTCGGACTTCTA   | 0 | 3  | 0 | 0 | 0 | 1 | 0 | 0 |
| Oe_mir_331 | FKYM01002677.1_29530:29557   | - | CAAGACCGTGAATTTTGATACCGTTGG      | 0 | 4  | 0 | 0 | 0 | 1 | 0 | 0 |
| Oe_mir_332 | FKYM01002526.1_49982:50013   | + | CTGTCATCGCTGTTGATTTATCTGGGGGATC  | 0 | 3  | 0 | 0 | 0 | 1 | 0 | 0 |
| Oe_mir_333 | FKYM01002507.1_947:976       | + | TTGGAGGAATTGTGGACTAGGCCTGGGAA    | 0 | 4  | 0 | 0 | 0 | 1 | 0 | 0 |
| Oe_mir_334 | FKYM01002091.1_17328:17356   | - | CCCCTGTTACCAAAACTGTCATACTGT      | 0 | 4  | 0 | 0 | 0 | 1 | 0 | 0 |
| Oe_mir_335 | FKYM01002017.1_7876:7903     | + | CGTGCTGGTACGGACTGAGGTTTTAT       | 0 | 3  | 0 | 7 | 0 | 1 | 0 | 2 |
| Oe_mir_336 | FKYM01001997.1_45585:45612   | + | TGGTGTTAAGAGGCAAGAAAGTGAGAT      | 0 | 3  | 0 | 0 | 0 | 1 | 0 | 0 |
| Oe_mir_337 | FKYM01001859.1_141973:142000 | - | GAGGAACCTCCTGAGCTGATGATGTGA      | 0 | 3  | 0 | 0 | 0 | 1 | 0 | 0 |
| Oe_mir_338 | FKYM01001075.1_1073:1101     | - | CCAAGTCAAGATCTCCCGTCGGTTATCGT    | 0 | 3  | 0 | 0 | 0 | 1 | 0 | 0 |
| Oe_mir_339 | FKYM01000829.1_14769:14800   | + | TCTTCTGGATTGAGCTCATCTGAAACTAAGCT | 0 | 4  | 0 | 0 | 0 | 1 | 0 | 0 |
| Oe_mir_340 | FKYM01000423.1_115924:115951 | - | TGTTACCTGGACTGCCTGCCATCATCC      | 0 | 4  | 0 | 0 | 0 | 1 | 0 | 0 |
| Oe_mir_341 | FKYM01000307.1_2869:2899     | + | CTCACTGTAGTACCATTGGAAGAATACTGG   | 0 | 18 | 0 | 0 | 0 | 3 | 0 | 0 |
| Oe_mir_342 | FKYM01000306.1_55757:55785   | - | CAACAAGAATGTTGAGTACTGGCAGCAGG    | 0 | 3  | 0 | 0 | 0 | 1 | 0 | 0 |
| Oe_mir_343 | FKYM01000034.1_132491:132518 | - | CGAAGTTGATATTATTCATCATAGCTG      | 0 | 3  | 0 | 0 | 0 | 1 | 0 | 0 |
| Oe_mir_344 | FKYM01056917.1_4069:4096     | + | GGGTGAACCTTGATAAAGACTGATAAACT    | 0 | 0  | 3 | 0 | 0 | 0 | 1 | 0 |
| Oe_mir_345 | FKYM01056571.1_23321:23350   | + | CGGTGATATGACCTCTTCTCTGAGGCAGT    | 0 | 0  | 4 | 0 | 0 | 0 | 2 | 0 |
| Oe_mir_346 | FKYM01055655.1_115505:115533 | + | TCTACCCTTCGACCACCTTAGCCGTTGGA    | 0 | 0  | 3 | 0 | 0 | 0 | 1 | 0 |
| Oe_mir_347 | FKYM01055504.1_37807:37834   | - | CATTGGGACATGATGTCGTCTGATCCAC     | 0 | 0  | 3 | 0 | 0 | 0 | 1 | 0 |
| Oe_mir_348 | FKYM01055053.1_33715:33742   | - | TTCTTTGACATGACAATCGGCGGTCAAC     | 0 | 0  | 3 | 0 | 0 | 0 | 1 | 0 |
| Oe_mir_349 | FKYM01054928.1_4030:4057     | - | ACTTGGTAGGAATGTAGTATTCTGTTTC     | 0 | 0  | 3 | 5 | 0 | 0 | 1 | 2 |

|            |                              |   |                                  |                                  |   |   |    |    |   |   |   |   |
|------------|------------------------------|---|----------------------------------|----------------------------------|---|---|----|----|---|---|---|---|
| Oe_mir_350 | FKYM01054349.1_17122:17150   | - | CTCTGTAGTGGATTGAGTGTGCATCCTTT    |                                  | 0 | 0 | 21 | 0  | 0 | 0 | 7 | 0 |
| Oe_mir_351 | FKYM01053416.1_1393:1420     | + |                                  | TAGTGGTATGATTCTCGCTTAGGGTGCG     | 0 | 0 | 6  | 0  | 0 | 0 | 2 | 0 |
| Oe_mir_352 | FKYM01052820.1_9440:9468     | + |                                  | CGTGGTAGAAACAACCACACCTCTGACTT    | 0 | 0 | 3  | 0  | 0 | 0 | 1 | 0 |
| Oe_mir_353 | FKYM01052084.1_102596:102623 | - | CGAGAATGGAGCTAAGGGTTGTGAGGTA     |                                  | 0 | 0 | 3  | 0  | 0 | 0 | 1 | 0 |
| Oe_mir_354 | FKYM01052049.1_2914:2945     | + |                                  | TGGCTGATTAGGAATCCTCTTGAATTTAGGTC | 0 | 0 | 4  | 0  | 0 | 0 | 2 | 0 |
| Oe_mir_355 | FKYM01052049.1_3096:3127     | + | CGTGAGGATTTCTCTCCGTCAGTATTCTCAT  |                                  | 0 | 0 | 1  | 0  | 0 | 0 | 1 | 0 |
| Oe_mir_356 | FKYM01051315.1_42025:42054   | + | GGAGGAGATGAGCCTGAGTAAATCAAAGTG   |                                  | 0 | 0 | 3  | 0  | 0 | 0 | 1 | 0 |
| Oe_mir_357 | FKYM01051081.1_22229:22258   | - |                                  | CTTCAAGGAATCCCATGAAGTCCCATGATC   | 0 | 0 | 4  | 0  | 0 | 0 | 2 | 0 |
| Oe_mir_358 | FKYM01048149.1_20186:20214   | - |                                  | CATTGAGAGACTCCGTGTTGTTGACATC     | 0 | 0 | 3  | 0  | 0 | 0 | 1 | 0 |
| Oe_mir_359 | FKYM01047269.1_37537:37565   | - | TTGATATATTTGATTACATTAAGAGAATG    |                                  | 0 | 0 | 3  | 0  | 0 | 0 | 1 | 0 |
| Oe_mir_360 | FKYM01047076.1_60339:60370   | + |                                  | ATTTTCGCGACTGTTGGAGTGTGTAGTTAT   | 0 | 0 | 3  | 0  | 0 | 0 | 1 | 0 |
| Oe_mir_361 | FKYM01046746.1_51420:51447   | + |                                  | ATGGACATGAACCTGGAGATGAAGGTGA     | 0 | 0 | 3  | 0  | 0 | 0 | 1 | 0 |
| Oe_mir_362 | FKYM01046385.1_14681:14712   | + |                                  | CCCAGTCTCAAGTGCAACCTGACCCTATCATC | 0 | 0 | 9  | 7  | 0 | 0 | 3 | 2 |
| Oe_mir_363 | FKYM01046256.1_64432:64462   | - | CCTTCGGACCCTTGACATTTTCATCGCCTTAC |                                  | 0 | 0 | 9  | 0  | 0 | 0 | 3 | 0 |
| Oe_mir_364 | FKYM01044424.1_72272:72299   | + |                                  | CTATGATGTTGATCTCAAATTTGTGCCA     | 0 | 0 | 3  | 0  | 0 | 0 | 1 | 0 |
| Oe_mir_365 | FKYM01042757.1_1085:1113     | - | AGGATGAAAATGGTGGAGAGCAGTGAAGA    |                                  | 0 | 0 | 3  | 0  | 0 | 0 | 1 | 0 |
| Oe_mir_366 | FKYM01041975.1_2987:3014     | - | GGAGGTGGTCTTAATGAAAAACAAAGCG     |                                  | 0 | 0 | 3  | 0  | 0 | 0 | 1 | 0 |
| Oe_mir_367 | FKYM01041563.1_53782:53810   | - | TGAGAAGTCCACTGAACCTTATCATTTAG    |                                  | 0 | 0 | 3  | 0  | 0 | 0 | 1 | 0 |
| Oe_mir_368 | FKYM01041531.1_9292:9319     | + |                                  | ACTGAACTCTGTTCTTGAATTTGTGTCT     | 0 | 0 | 4  | 0  | 0 | 0 | 2 | 0 |
| Oe_mir_369 | FKYM01041155.1_13199:13226   | + | GGATACTCTGAGATAGAGCGAGAAAAAT     |                                  | 0 | 0 | 8  | 0  | 0 | 0 | 3 | 0 |
| Oe_mir_370 | FKYM01040723.1_27723:27753   | - |                                  | CGGGTTCGAATCTTTGGTTGGCACTTCCTTT  | 0 | 0 | 4  | 0  | 0 | 0 | 2 | 0 |
| Oe_mir_371 | FKYM01040102.1_14957:14985   | + | CTCCCCAAATTAGCCTTGCCCAAGTATCCC   |                                  | 0 | 0 | 3  | 0  | 0 | 0 | 1 | 0 |
| Oe_mir_372 | FKYM01038735.1_2416:2443     | - | CTTGTTTACAAGTAGATAGTGGCTAGCT     |                                  | 0 | 0 | 3  | 0  | 0 | 0 | 1 | 0 |
| Oe_mir_373 | FKYM01035905.1_70113:70141   | - |                                  | CAGTTGGTTAGAGCGTGGCTGTTAACC      | 0 | 0 | 5  | 6  | 0 | 0 | 2 | 2 |
| Oe_mir_374 | FKYM01035436.1_188744:188772 | + |                                  | GTGGCCAAGTGGTAAGGCAACGGGTTTTG    | 0 | 0 | 5  | 10 | 0 | 0 | 2 | 3 |
| Oe_mir_375 | FKYM01034996.1_25393:25420   | + | ATACTCTGAGGATGTTCTGCATTGGCTT     |                                  | 0 | 0 | 3  | 0  | 0 | 0 | 1 | 0 |
| Oe_mir_376 | FKYM01034384.1_70207:70234   | + | TCTCTGAGCACCCGATGTCTGCTACTAT     |                                  | 0 | 0 | 3  | 0  | 0 | 0 | 1 | 0 |
| Oe_mir_377 | FKYM01034242.1_1585:1612     | + | ATAGGTTTAATTTCTGTAGACTCACAT      |                                  | 0 | 0 | 5  | 0  | 0 | 0 | 2 | 0 |
| Oe_mir_378 | FKYM01034207.1_114302:114330 | - | TTACTCCGAGGCATCTCCAGCTTGCTATT    |                                  | 0 | 0 | 3  | 0  | 0 | 0 | 1 | 0 |
| Oe_mir_379 | FKYM01033615.1_75822:75849   | - | CTGCCACTTGTTGATTTTGTAAACCCATT    |                                  | 0 | 0 | 3  | 0  | 0 | 0 | 1 | 0 |
| Oe_mir_380 | FKYM01033607.1_64785:64814   | - |                                  | AGACAAAGATTGAGCCCTAAGATTTTCAGA   | 0 | 0 | 3  | 0  | 0 | 0 | 1 | 0 |
| Oe_mir_381 | FKYM01032996.1_78923:78950   | + |                                  | GAACTTGACAGTCTCCTCACAAATCGC      | 0 | 0 | 3  | 0  | 0 | 0 | 1 | 0 |

|            |                            |   |                                |                                  |   |   |    |    |   |   |    |   |
|------------|----------------------------|---|--------------------------------|----------------------------------|---|---|----|----|---|---|----|---|
| Oe_mir_382 | FKYM01032621.1_5808:5838   | - |                                | TTGGTTAAAGGCTTGTGGATTATATAGT     | 0 | 0 | 3  | 0  | 0 | 0 | 1  | 0 |
| Oe_mir_383 | FKYM01032104.1_25853:25882 | + | TGGATCAAGGTCTGGATTATGTCGCCACAT |                                  | 0 | 0 | 8  | 0  | 0 | 0 | 3  | 0 |
| Oe_mir_384 | FKYM01031755.1_83362:83390 | + |                                | AATGGCAAGAGTAGCGGGCACCGATACT     | 0 | 0 | 6  | 0  | 0 | 0 | 2  | 0 |
| Oe_mir_385 | FKYM01030426.1_12797:12825 | - |                                | TGGAAGGGACGCATTTATTAGATAAAATGG   | 0 | 0 | 4  | 0  | 0 | 0 | 2  | 0 |
| Oe_mir_386 | FKYM01030409.1_2386:2414   | + | ATAGTTACGTGCGGATGGTTGCATCTATT  |                                  | 0 | 0 | 3  | 0  | 0 | 0 | 1  | 0 |
| Oe_mir_387 | FKYM01029890.1_12727:12756 | - | GATGTCGATCCTGAGCGGTTACCTGAGCAA |                                  | 0 | 0 | 57 | 0  | 0 | 0 | 19 | 0 |
| Oe_mir_388 | FKYM01029816.1_35171:35198 | - |                                | TGATTTTATGCAAGCTGCTAAGTCCGT      | 0 | 0 | 3  | 0  | 0 | 0 | 1  | 0 |
| Oe_mir_389 | FKYM01028429.1_562:589     | + |                                | CATCGACTCCGATCTGTATTGTCTCGTT     | 0 | 0 | 3  | 0  | 0 | 0 | 1  | 0 |
| Oe_mir_390 | FKYM01027163.1_47489:47518 | + |                                | GTCCCGTGATTGGTGTTCGTGCCAAGCTGA   | 0 | 0 | 3  | 0  | 0 | 0 | 1  | 0 |
| Oe_mir_391 | FKYM01025940.1_24229:24256 | + | GCGATTTCTTGGCTACGGAGTGTGTTTC   |                                  | 0 | 0 | 3  | 0  | 0 | 0 | 1  | 0 |
| Oe_mir_392 | FKYM01025563.1_59213:59241 | + | CTTTGTCTTTGGGGCTTACAATCACCTA   |                                  | 0 | 0 | 5  | 22 | 0 | 0 | 2  | 6 |
| Oe_mir_393 | FKYM01025050.1_77586:77615 | + | GTGCTTGTGAACCTTGTCTCTTGAAGCC   |                                  | 0 | 0 | 3  | 0  | 0 | 0 | 1  | 0 |
| Oe_mir_394 | FKYM01024844.1_50311:50339 | - |                                | TCGGTGGTGATGAAGTCGAAAACGGAGTG    | 0 | 0 | 3  | 0  | 0 | 0 | 1  | 0 |
| Oe_mir_395 | FKYM01023070.1_36911:36938 | - |                                | CTTGGACCGTTGGATTGATCCGCTGATC     | 0 | 0 | 3  | 0  | 0 | 0 | 1  | 0 |
| Oe_mir_396 | FKYM01022924.1_253:282     | + |                                | AACGTCGAGGAACATGTACTAGGGTGTATG   | 0 | 0 | 4  | 0  | 0 | 0 | 2  | 0 |
| Oe_mir_397 | FKYM01022360.1_18268:18298 | - | GCCCTGGGAAGTCTCGTGTGCACCCCTTT  |                                  | 0 | 0 | 73 | 0  | 0 | 0 | 24 | 0 |
| Oe_mir_398 | FKYM01022359.1_9984:10015  | - | GGGTGACCCCTGGGAAGTCCTCGTGTGCC  |                                  | 0 | 0 | 7  | 0  | 0 | 0 | 3  | 0 |
| Oe_mir_399 | FKYM01022358.1_11341:11368 | - |                                | CACCTGGGAAGTCTCGTGTGCCCCCT       | 0 | 0 | 4  | 0  | 0 | 0 | 2  | 0 |
| Oe_mir_400 | FKYM01022358.1_11011:11039 | - | CCTCTGGGAAGTCTCGTGTGCACCCC     |                                  | 0 | 0 | 11 | 0  | 0 | 0 | 4  | 0 |
| Oe_mir_401 | FKYM01022014.1_1538:1568   | + |                                | TCTGTGATGGTAAATGGGTGTGGTCTGAGCC  | 0 | 0 | 4  | 0  | 0 | 0 | 2  | 0 |
| Oe_mir_402 | FKYM01021782.1_22601:22628 | + | TTCCATCACGCTTTGTTGTAGGGCAGG    |                                  | 0 | 0 | 8  | 9  | 0 | 0 | 3  | 3 |
| Oe_mir_403 | FKYM01020958.1_18271:18300 | + |                                | GCATTTGGTCTAGTGGTATGATTCTCGCTT   | 0 | 0 | 21 | 0  | 0 | 0 | 7  | 0 |
| Oe_mir_404 | FKYM01019895.1_7600:7630   | - |                                | CTTTATTACGTCTGGGAGCTGGAGCTTGTGC  | 0 | 0 | 4  | 0  | 0 | 0 | 2  | 0 |
| Oe_mir_405 | FKYM01018308.1_24987:25016 | + | TTTCAGCAACGGATTTCTGGCTCTCGCAT  |                                  | 0 | 0 | 5  | 0  | 0 | 0 | 2  | 0 |
| Oe_mir_406 | FKYM01017665.1_47362:47391 | - | ATAAATGTTGGGCTGTTATTCTTGTGCAC  |                                  | 0 | 0 | 4  | 0  | 0 | 0 | 2  | 0 |
| Oe_mir_407 | FKYM01015766.1_8152:8179   | + |                                | TGGCAGCTGGAGAAGTGAACGCAAT        | 0 | 0 | 3  | 0  | 0 | 0 | 1  | 0 |
| Oe_mir_408 | FKYM01015060.1_2770:2799   | + | GGATCTGAGAAAAGCTCCAGTCTGAAGGA  |                                  | 0 | 0 | 4  | 0  | 0 | 0 | 2  | 0 |
| Oe_mir_409 | FKYM01014142.1_11310:11340 | - |                                | CACTGCCAGAGAAGTGTGGAGCAACCCATA   | 0 | 0 | 3  | 0  | 0 | 0 | 1  | 0 |
| Oe_mir_410 | FKYM01013352.1_54315:54343 | - | GCTGTCTATCATCTGAATTCGGTTTAGA   |                                  | 0 | 0 | 4  | 6  | 0 | 0 | 2  | 2 |
| Oe_mir_411 | FKYM01013088.1_48462:48490 | + | GGGAGGAGCAACTGAAGGAACAGATGGCT  |                                  | 0 | 0 | 3  | 0  | 0 | 0 | 1  | 0 |
| Oe_mir_412 | FKYM01012168.1_18221:18252 | - |                                | CAACGAAGACTGCAGTGTAGCTGAGCCTATAG | 0 | 0 | 3  | 0  | 0 | 0 | 1  | 0 |
| Oe_mir_413 | FKYM01011530.1_43070:43097 | + |                                | GTTGGTCTTCAACGAGGAATTCCTAGTA     | 0 | 0 | 3  | 0  | 0 | 0 | 1  | 0 |

|            |                              |   |                                 |                                   |   |   |    |    |   |   |   |   |
|------------|------------------------------|---|---------------------------------|-----------------------------------|---|---|----|----|---|---|---|---|
| Oe_mir_414 | FKYM01010415.1_37449:37477   | + |                                 | GTTTGACAAACTCGACACTTGGCGGCCCC     | 0 | 0 | 3  | 0  | 0 | 0 | 1 | 0 |
| Oe_mir_415 | FKYM01007418.1_15487:15515   | - |                                 | CCGTGTTTATGGATTGGATCGTTTCTGCC     | 0 | 0 | 7  | 0  | 0 | 0 | 3 | 0 |
| Oe_mir_416 | FKYM01006167.1_127537:127566 | - | CAAGAAGAGGAATGTAAAACCTTGTGCCATG |                                   | 0 | 0 | 3  | 0  | 0 | 0 | 1 | 0 |
| Oe_mir_417 | FKYM01004872.1_28641:28669   | - | CAGAGAACTTACAATAATACAACGCCGCA   |                                   | 0 | 0 | 3  | 0  | 0 | 0 | 1 | 0 |
| Oe_mir_418 | FKYM01004493.1_7151:7181     | - |                                 | CTCCTCCTCTCACATGGGGTTCGGACTCCAC   | 0 | 0 | 3  | 0  | 0 | 0 | 1 | 0 |
| Oe_mir_419 | FKYM01003996.1_54815:54844   | - | CTGGTTGCTCTGGTTTATTTGGTGTCTGTT  |                                   | 0 | 0 | 3  | 0  | 0 | 0 | 1 | 0 |
| Oe_mir_420 | FKYM01003711.1_24032:24059   | + |                                 | CCTACCTATTGACCGCAACTTCTGTAT       | 0 | 0 | 21 | 0  | 0 | 0 | 7 | 0 |
| Oe_mir_421 | FKYM01002812.1_8506:8533     | + |                                 | TTTTGGTCTTTCAAGGGTGTTCATTGTC      | 0 | 0 | 5  | 0  | 0 | 0 | 2 | 0 |
| Oe_mir_422 | FKYM01002408.1_65648:65677   | + | AGTGTGAAAATCCAATGGTGTGGGCTCCTG  |                                   | 0 | 0 | 4  | 0  | 0 | 0 | 2 | 0 |
| Oe_mir_423 | FKYM01001628.1_127866:127894 | + |                                 | TCACATCGACGGGAAGGTTTGGCACCTCG     | 0 | 0 | 3  | 0  | 0 | 0 | 1 | 0 |
| Oe_mir_424 | FKYM01001537.1_46654:46681   | + |                                 | AGAGTAACTATTGTATGTCGTGTAGA        | 0 | 0 | 4  | 0  | 0 | 0 | 2 | 0 |
| Oe_mir_425 | FKYM01000034.1_133738:133766 | - | CTCATCGGGGTTGCCATGCAGATTGGCG    |                                   | 0 | 0 | 3  | 0  | 0 | 0 | 1 | 0 |
| Oe_mir_426 | FKYM01055738.1_692:719       | - |                                 | CGGTGCATCGAAACTCTATTTAGTAAG       | 0 | 0 | 0  | 4  | 0 | 0 | 0 | 1 |
| Oe_mir_427 | FKYM01055253.1_22607:22638   | + |                                 | CGGGTTCGAATCTTTGGTTGGCACTTCCTTAG  | 0 | 0 | 0  | 7  | 0 | 0 | 0 | 2 |
| Oe_mir_428 | FKYM01054914.1_2650:2677     | + | CTTTTCGTTGAGTTGGGTCGGCAAGGA     |                                   | 0 | 0 | 0  | 4  | 0 | 0 | 0 | 1 |
| Oe_mir_429 | FKYM01054349.1_17121:17150   | - | CTCTGTAGTGGATTGAGTGTGCATCCTTTT  |                                   | 0 | 0 | 0  | 6  | 0 | 0 | 0 | 2 |
| Oe_mir_430 | FKYM01053846.1_27861:27890   | + |                                 | CACCACCATTTTCAACCTATCAAACCTGC     | 0 | 0 | 0  | 3  | 0 | 0 | 0 | 1 |
| Oe_mir_431 | FKYM01053416.1_1715:1746     | - |                                 | CATTTGGTCTAGTGGTATGATTTCTCGCTTTGG | 0 | 0 | 0  | 3  | 0 | 0 | 0 | 1 |
| Oe_mir_432 | FKYM01052374.1_12957:12987   | - | GGTGCTTGTTCGCTTGAATAAAAAATACAGT |                                   | 0 | 0 | 0  | 3  | 0 | 0 | 0 | 1 |
| Oe_mir_433 | FKYM01052158.1_37789:37817   | - |                                 | TCCATAAECTCAAAGGATTCGGTCGGAA      | 0 | 0 | 0  | 4  | 0 | 0 | 0 | 1 |
| Oe_mir_434 | FKYM01052107.1_7040:7067     | - | CTCGGACCAGGCTTCAITCCCCCAACT     |                                   | 0 | 0 | 0  | 3  | 0 | 0 | 0 | 1 |
| Oe_mir_435 | FKYM01051969.1_19399:19427   | + |                                 | TCAAGGTGATGCTGATGATAAACTGGTGC     | 0 | 0 | 0  | 3  | 0 | 0 | 0 | 1 |
| Oe_mir_436 | FKYM01051778.1_52:81         | - | CAAGGCTCTTAACCTTGTGGTCTGGGGTTC  |                                   | 0 | 0 | 0  | 3  | 0 | 0 | 0 | 1 |
| Oe_mir_437 | FKYM01050294.1_1154:1182     | - | CTCTGAGTTCGACGTTGAATAGCCATAGT   |                                   | 0 | 0 | 0  | 4  | 0 | 0 | 0 | 1 |
| Oe_mir_438 | FKYM01047025.1_8816:8844     | + | TACTTGTGAAAACCTGAATGCAAGATGTTT  |                                   | 0 | 0 | 0  | 3  | 0 | 0 | 0 | 1 |
| Oe_mir_439 | FKYM01046256.1_64435:64464   | - | CTCCTTCGGACCCTTGACATTTTCATCGCCT |                                   | 0 | 0 | 0  | 11 | 0 | 0 | 0 | 3 |
| Oe_mir_440 | FKYM01046040.1_6951:6979     | - | CAGAGGTCGTGAGTTCGAAACATGGGGCT   |                                   | 0 | 0 | 0  | 3  | 0 | 0 | 0 | 1 |
| Oe_mir_441 | FKYM01044089.1_10441:10469   | + |                                 | GTGTGATTAATAATGAAAGAGAAAAA        | 0 | 0 | 0  | 3  | 0 | 0 | 0 | 1 |
| Oe_mir_442 | FKYM01043838.1_1480:1507     | + |                                 | TCGTTCAATTTCCATTTCCATCGACCATT     | 0 | 0 | 0  | 4  | 0 | 0 | 0 | 1 |
| Oe_mir_443 | FKYM01042756.1_3717:3745     | - |                                 | TCTTAACCACTGTCCACCTTGAATCAC       | 0 | 0 | 0  | 3  | 0 | 0 | 0 | 1 |
| Oe_mir_444 | FKYM01042675.1_28157:28185   | + | CGAGGAGGGGCTCATGACGGGGTGTGG     |                                   | 0 | 0 | 0  | 4  | 0 | 0 | 0 | 1 |
| Oe_mir_445 | FKYM01042141.1_13034:13062   | + |                                 | CCAACATGTCAGAAATAAGAGCTTGCTC      | 0 | 0 | 0  | 3  | 0 | 0 | 0 | 1 |

|            |                              |   |                                  |                                  |   |   |   |    |   |   |   |    |
|------------|------------------------------|---|----------------------------------|----------------------------------|---|---|---|----|---|---|---|----|
| Oe_mir_446 | FKYM01041563.1_53968:53996   | - |                                  | TGTGATGGGGATAGATCATTGCAATTGTT    | 0 | 0 | 0 | 3  | 0 | 0 | 0 | 1  |
| Oe_mir_447 | FKYM01041226.1_24538:24566   | + | ACCCATGGGGATTACAAGTCTGAGATGC     |                                  | 0 | 0 | 0 | 14 | 0 | 0 | 0 | 4  |
| Oe_mir_448 | FKYM01040730.1_160344:160373 | - | CGCTCGGCTCGCCGTTGACTCTGGTGGTGA   |                                  | 0 | 0 | 0 | 3  | 0 | 0 | 0 | 1  |
| Oe_mir_449 | FKYM01040669.1_64843:64874   | - |                                  | CGGACGAGAAAGACAGTGTGACGGTGGAGAG  | 0 | 0 | 0 | 3  | 0 | 0 | 0 | 1  |
| Oe_mir_450 | FKYM01039618.1_3599:3629     | - | CTTCCAGCAATTTATAATAATCCAGACGTAC  |                                  | 0 | 0 | 0 | 3  | 0 | 0 | 0 | 1  |
| Oe_mir_451 | FKYM01038484.1_2158:2187     | + |                                  | GTTGTCCCTTCTCGTTCTATTATTATCT     | 0 | 0 | 0 | 3  | 0 | 0 | 0 | 1  |
| Oe_mir_452 | FKYM01038462.1_1224:1252     | + | TGGTTGATCCTGCCAGTAGTCATATGCTT    |                                  | 0 | 0 | 0 | 10 | 0 | 0 | 0 | 3  |
| Oe_mir_453 | FKYM01036119.1_83981:84012   | - |                                  | CCGGGTTTGAATCTTTGGTTGGCACTTCCTTT | 0 | 0 | 0 | 62 | 0 | 0 | 0 | 16 |
| Oe_mir_454 | FKYM01035439.1_6502:6533     | - |                                  | TTGTTGTCGATGTTGTGGTAAACTGAGCCCGA | 0 | 0 | 0 | 5  | 0 | 0 | 0 | 2  |
| Oe_mir_455 | FKYM01034081.1_28300:28331   | - | CTTTGGAAATTTAGGCTCTGTGTTTGTGGG   |                                  | 0 | 0 | 0 | 3  | 0 | 0 | 0 | 1  |
| Oe_mir_456 | FKYM01033960.1_62696:62723   | + | CGAACCTTGACGCGGCAGCCTCAATCA      |                                  | 0 | 0 | 0 | 3  | 0 | 0 | 0 | 1  |
| Oe_mir_457 | FKYM01033524.1_70787:70817   | - | CTGAATGATCTCGGACCAGGCTTCATCCCC   |                                  | 0 | 0 | 0 | 3  | 0 | 0 | 0 | 1  |
| Oe_mir_458 | FKYM01032968.1_33117:33144   | - | GTGGCACTTACTTACTTGTATAGAGATA     |                                  | 0 | 0 | 0 | 5  | 0 | 0 | 0 | 2  |
| Oe_mir_459 | FKYM01032634.1_9323:9351     | + | ACTCCCTGTTGTAATAATGTTTAGATCAT    |                                  | 0 | 0 | 0 | 3  | 0 | 0 | 0 | 1  |
| Oe_mir_460 | FKYM01031741.1_33313:33343   | + |                                  | TTTGGGTGCGAGAGGTCCCAGTTCGATTCT   | 0 | 0 | 0 | 3  | 0 | 0 | 0 | 1  |
| Oe_mir_461 | FKYM01031732.1_27776:27803   | - |                                  | TAGACCTTGTGTGTGTCAGAATCTTAA      | 0 | 0 | 0 | 10 | 0 | 0 | 0 | 3  |
| Oe_mir_462 | FKYM01030017.1_17868:17897   | + |                                  | TTGGCGAGGAAGGTGTCTCTGTTTAGGGCG   | 0 | 0 | 0 | 3  | 0 | 0 | 0 | 1  |
| Oe_mir_463 | FKYM01030017.1_18270:18299   | + | TGGAACGGTATAAACCCCTGCTAGGAGCTT   |                                  | 0 | 0 | 0 | 2  | 0 | 0 | 0 | 1  |
| Oe_mir_464 | FKYM01027470.1_5567:5595     | - | CTCATGGCCTAGTATTTACATCGTTAAC     |                                  | 0 | 0 | 0 | 3  | 0 | 0 | 0 | 1  |
| Oe_mir_465 | FKYM01026946.1_9147:9175     | - |                                  | TACATGGAAATACTCAGTAGAATATAAAA    | 0 | 0 | 0 | 3  | 0 | 0 | 0 | 1  |
| Oe_mir_466 | FKYM01025050.1_61504:61532   | + |                                  | AAGTCTCAGGATCGTATTATTGGAGCCCA    | 0 | 0 | 0 | 3  | 0 | 0 | 0 | 1  |
| Oe_mir_467 | FKYM01025050.1_77573:77604   | + | CTCTGGCTGTCGCGTGCTTGGAACCCCTTGCT |                                  | 0 | 0 | 0 | 3  | 0 | 0 | 0 | 1  |
| Oe_mir_468 | FKYM01025035.1_62024:62052   | + | CCCTAATCGGCTTGTGTAGACGAGGCCG     |                                  | 0 | 0 | 0 | 3  | 0 | 0 | 0 | 1  |
| Oe_mir_469 | FKYM01024763.1_628:656       | - | GGGGATGCCGAAGGCAGGGCTAGTACTG     |                                  | 0 | 0 | 0 | 16 | 0 | 0 | 0 | 4  |
| Oe_mir_470 | FKYM01023719.1_39867:39896   | - |                                  | TGTTGGGGCTGACTACTTTGACAGGCCACA   | 0 | 0 | 0 | 3  | 0 | 0 | 0 | 1  |
| Oe_mir_471 | FKYM01022884.1_67927:67955   | - |                                  | CCGAACGCTACGGTCCACTCATGATGCTT    | 0 | 0 | 0 | 4  | 0 | 0 | 0 | 1  |
| Oe_mir_472 | FKYM01022360.1_19589:19618   | - | CCCCCTGGGAAGTCCCTCGTGTGTACCTCT   |                                  | 0 | 0 | 0 | 6  | 0 | 0 | 0 | 2  |
| Oe_mir_473 | FKYM01022359.1_5334:5362     | - |                                  | CCCATGGGAAGTCCCTCGTGTGCACCCCT    | 0 | 0 | 0 | 9  | 0 | 0 | 0 | 3  |
| Oe_mir_474 | FKYM01022358.1_22800:22827   | - | CTTGGGCGAGAGTAGAACTAGGATGGGT     |                                  | 0 | 0 | 0 | 3  | 0 | 0 | 0 | 1  |
| Oe_mir_475 | FKYM01021684.1_47380:47409   | - | CCGACAGGAAGGATAGGAATGGCTGCCCA    |                                  | 0 | 0 | 0 | 3  | 0 | 0 | 0 | 1  |
| Oe_mir_476 | FKYM01020992.1_55159:55190   | - |                                  | TAGGCTGGTTCGGATTGGTTATACATAGTTCC | 0 | 0 | 0 | 13 | 0 | 0 | 0 | 4  |
| Oe_mir_477 | FKYM01020978.1_1376:1407     | - | CTAATGAATTCCTGGGAACCTTCTATAGTAAA |                                  | 0 | 0 | 0 | 4  | 0 | 0 | 0 | 1  |

|            |                            |   |                                  |                                 |   |   |   |    |   |   |   |   |
|------------|----------------------------|---|----------------------------------|---------------------------------|---|---|---|----|---|---|---|---|
| Oe_mir_478 | FKYM01014973.1_4534:4561   | - | CGGGCCTGGGTTCACTGGAAGAAGCTAG     |                                 | 0 | 0 | 0 | 3  | 0 | 0 | 0 | 1 |
| Oe_mir_479 | FKYM01013831.1_82961:82990 | + |                                  | TTCAATCCAATAGATCTGATCTGAGCCTCA  | 0 | 0 | 0 | 14 | 0 | 0 | 0 | 4 |
| Oe_mir_480 | FKYM01012340.1_10912:10941 | + | GGCAGGGGCTATATTAAGAGCAGAGACCTT   |                                 | 0 | 0 | 0 | 3  | 0 | 0 | 0 | 1 |
| Oe_mir_481 | FKYM01011433.1_17511:17539 | + |                                  | CCCTATTTGTTGGTCCGTTCTAGTGATA    | 0 | 0 | 0 | 16 | 0 | 0 | 0 | 4 |
| Oe_mir_482 | FKYM01008235.1_32541:32568 | - |                                  | TTTTGTTGATTGAACTTTTGTATCAG      | 0 | 0 | 0 | 3  | 0 | 0 | 0 | 1 |
| Oe_mir_483 | FKYM01006869.1_3254:3284   | - |                                  | CCCCGTGAAACTCTCCATGAACTTTTGAAAC | 0 | 0 | 0 | 3  | 0 | 0 | 0 | 1 |
| Oe_mir_484 | FKYM01004084.1_58055:58083 | + |                                  | AGTCGACTTTAGCGAAACACCCTTTGACA   | 0 | 0 | 0 | 4  | 0 | 0 | 0 | 1 |
| Oe_mir_485 | FKYM01003121.1_36001:36030 | + | AATGGCCTCCACCATCCATCACCCGGCT     |                                 | 0 | 0 | 0 | 3  | 0 | 0 | 0 | 1 |
| Oe_mir_486 | FKYM01002413.1_7066:7097   | + | TTTCATAGCTCAGTTGGTTAGAGCACCCGTTT |                                 | 0 | 0 | 0 | 4  | 0 | 0 | 0 | 1 |
| Oe_mir_487 | FKYM01002296.1_87009:87040 | + |                                  | ATCGTGGATCGGTGGACAGCATTCTTTAACC | 0 | 0 | 0 | 3  | 0 | 0 | 0 | 1 |
| Oe_mir_488 | FKYM01002105.1_14741:14770 | - | CTTGAGGATGGCCGCACTCTTGCCGATTAC   |                                 | 0 | 0 | 0 | 3  | 0 | 0 | 0 | 1 |
| Oe_mir_489 | FKYM01001537.1_46651:46681 | + |                                  | CTCAGAGTTAACTATTTGTATGTCGTGTAGA | 0 | 0 | 0 | 3  | 0 | 0 | 0 | 1 |
| Oe_mir_490 | FKYM01000977.1_18441:18469 | + |                                  | TGAGACTGGTGTGGATATGGGGAGTGGT    | 0 | 0 | 0 | 3  | 0 | 0 | 0 | 1 |
| Oe_mir_491 | FKYM01000760.1_40439:40467 | + |                                  | GGTTTACCGGTGTGTACCCCTTGACCCT    | 0 | 0 | 0 | 7  | 0 | 0 | 0 | 2 |
| Oe_mir_492 | FKYM01000760.1_40646:40673 | + | GGATTGAATGGACTGAGACCGAGGAACT     |                                 | 0 | 0 | 0 | 1  | 0 | 0 | 0 | 1 |
